# Supplementary material for: Structural diversity of copper(i) alkynyl cluster-based coordination polymers utilizing bifunctional pyridine carboxylic acid ligands
Source: Royal Society of Chemistry journal article supplement (doi:10.1039/d4nr02543a), 2024-01-01
Supplement: d4nr02543a1.pdf [file d4nr02543a1.pdf]

# Structural Diversity of Copper(I) Alkynyl Cluster-Based Coordination Polymers Utilizing Bifunctional Pyridine Carboxylic Acid Ligands

Zheng Liu,<sup>a</sup> Jun-Jie Fang,<sup>a</sup> Zhi-Yi Wang,<sup>a</sup> Yun-Peng Xie,<sup>\*,a</sup> and Xing Lu<sup>\*,a,b</sup>

<sup>a</sup> State Key Laboratory of Materials Processing and Die & Mould Technology, School of Materials Science and Engineering, Huazhong University of Science and Technology, Wuhan 430074, China.

<sup>b</sup> School of Chemistry and Chemical Engineering, Hainan University, No. 58, Renmin Avenue, Haikou 570228, China

\*Corresponding Author: xieyp@hust.edu.cn, lux@hust.edu.cn

|                                                |           |
|------------------------------------------------|-----------|
| <b>Experimental Section .....</b>              | <b>2</b>  |
| <b>Synthesis of CACPs .....</b>                | <b>2</b>  |
| <b>Instrumentation .....</b>                   | <b>3</b>  |
| <b>Characterizations .....</b>                 | <b>4</b>  |
| <b>Powder X-ray Diffraction Patterns .....</b> | <b>4</b>  |
| <b>Photophysical Properties.....</b>           | <b>6</b>  |
| <b>Crystal Structure .....</b>                 | <b>11</b> |
| <b>Crystal Data .....</b>                      | <b>15</b> |

## Experimental Section

### Synthesis of CACPs

**Synthesis of 1a.** In a conical flask, Cu<sub>2</sub>O (0.71 mg, 0.5 mmol) and INA (41 mg, 0.33 mmol) were combined in a 7.5 mL mixed solvent of methanol and acetonitrile (2:1). Subsequently, 100 μL of <sup>1</sup>BuC≡CH and 50 μL of Hhfac were added dropwise following sonication of the mixture for 30 minutes. The mixture was then stirred at room temperature for 12 hours before being subjected to a solvothermal reaction within a Teflon-lined vessel at 80°C, yielding yellow bulk crystals after 20 hours. The resulting yellow powdered product was collected following washing with methanol and acetone and subsequent drying in a vacuum oven, affording a yield of 53 mg.

**Synthesis of 1b.** In a conical flask, Cu<sub>2</sub>O (0.71 mg, 0.5 mmol) and INA (33 mg, 0.29 mmol) were combined in a 7.5 mL mixed solvent of methanol and acetonitrile (2:1). Subsequently, 100 μL of <sup>1</sup>BuC≡CH and 100 μL of Hhfac were added dropwise following sonication of the mixture for 30 minutes. The mixture was then stirred at room temperature for 12 hours before being subjected to a solvothermal reaction within a Teflon-lined vessel at 80°C, yellow crystals of **1b** were produced as a by-product of **1a** after 20 hours.

**Synthesis of 1c.** In a conical flask, Cu<sub>2</sub>O (0.71 mg, 0.5 mmol) and INA (20.5 mg, 0.17 mmol) were combined in a 7.5 mL mixed solvent of methanol and DMF (2:1). Subsequently, 100 μL of <sup>1</sup>BuC≡CH, 50 μL of Hhfac and 20 μL of deionized water were added dropwise following sonication of the mixture for 30 minutes. The mixture was then stirred at room temperature for 12 hours before being subjected to a solvothermal reaction within a Teflon-lined vessel at 80°C, yielding yellow bulk crystals after 20 hours. The resulting yellow powdered product was collected following washing with methanol and acetone and subsequent drying in a vacuum oven, affording a yield of 26 mg.

**Synthesis of 1d.** In a conical flask, Cu<sub>2</sub>O (0.71 mg, 0.5 mmol) and INA (20.5 mg, 0.17 mmol) were combined in a 7.5 mL mixed solvent of methanol and acetonitrile (2:1). Subsequently, 100 μL of <sup>1</sup>BuC≡CH, 50 μL of Hhfac and 20 μL of deionized water were added dropwise following sonication of the mixture for 30 minutes. The mixture was then stirred at room temperature for 12 hours before being subjected to a solvothermal reaction within a Teflon-lined vessel at 80°C, yellow crystals of **1d** were produced as a by-product of **1c** after 20 hours.

**Synthesis of 2a.** In a conical flask, Cu<sub>2</sub>O (0.71 mg, 0.5 mmol) and IQL (69.2 mg, 0.4 mmol) were combined in a 7.5 mL mixed solvent of methanol and DMF (2:1). Subsequently, 100 μL of <sup>1</sup>BuC≡CH, 50 μL of Hhfac and 20 μL of deionized water were added dropwise following sonication of the mixture for 30 minutes. The mixture was then stirred at room temperature for 12 hours before being subjected to a solvothermal reaction within a Teflon-lined vessel at 80°C, yellow crystals of **2a** were produced as a by-product of **2c** after 20 hours.

**Synthesis of 2b.** In a conical flask, Cu<sub>2</sub>O (0.71 mg, 0.5 mmol) and IQL (69.2 mg, 0.4 mmol) were combined in a 7.5 mL mixed solvent of methanol and DMF (2:1). Subsequently, 100  $\mu$ L of <sup>13</sup>BuC $\equiv$ CH and 50  $\mu$ L of Hhfac were added dropwise following sonication of the mixture for 30 minutes. The mixture was then stirred at room temperature for 12 hours before being subjected to a solvothermal reaction within a Teflon-lined vessel at 80°C, yellow crystals of **2b** were produced as a by-product of **2c** after 20 hours.

**Synthesis of 2c.** In a conical flask, Cu<sub>2</sub>O (0.71 mg, 0.5 mmol) and IQL (69.2 mg, 0.4 mmol) were combined in a 7.5 mL mixed solvent of methanol and DMF (2:1). Subsequently, 100  $\mu$ L of <sup>13</sup>BuC $\equiv$ CH, 50  $\mu$ L of Hhfac and 20 $\mu$ L of deionized water were added dropwise following sonication of the mixture for 30 minutes. The mixture was then stirred at room temperature for 12 hours before being subjected to a solvothermal reaction within a Teflon-lined vessel at 80°C, yielding yellow bulk crystals after 20 hours. The resulting yellow powdered product was collected following washing with methanol and acetone and subsequent drying in a vacuum oven, affording a yield of 46 mg.

**Synthesis of 3.** In a conical flask, Cu<sub>2</sub>O (0.71 mg, 0.5 mmol) and 4-PyBA (33.2 mg, 0.167 mmol) were combined in a 7.5 mL mixed solvent of methanol and DMF (2:1). Subsequently, 100  $\mu$ L of <sup>13</sup>BuC $\equiv$ CH, 50  $\mu$ L of Hhfac were added dropwise following sonication of the mixture for 30 minutes. The mixture was then stirred at room temperature for 12 hours before being subjected to a solvothermal reaction within a Teflon-lined vessel at 80°C, yielding yellow bulk crystals after 20 hours. The resulting yellow powdered product was collected following washing with methanol and acetone and subsequent drying in a vacuum oven, affording a yield of 66 mg.

**Synthesis of 4.** In a conical flask, Cu<sub>2</sub>O (0.71 mg, 0.5 mmol) and IQL (33.2 mg, 0.167 mmol) were combined in a 7.5 mL mixed solvent of methanol and DMF (2:1). Subsequently, 100  $\mu$ L of <sup>13</sup>BuC $\equiv$ CH, 50  $\mu$ L of DMF and 20 $\mu$ L of deionized water were added dropwise following sonication of the mixture for 30 minutes. The mixture was then stirred at room temperature for 12 hours before being subjected to a solvothermal reaction within a Teflon-lined vessel at 80°C, yielding yellow bulk crystals after 20 hours. The resulting yellow powdered product was collected following washing with methanol and acetone and subsequent drying in a vacuum oven, affording a yield of 36 mg.

## Instrumentation

All reagents and solvents utilized in the experiments were commercially available and deemed suitable for immediate use without requiring further purification. Vis-NIR experiments were conducted using a PE Lambda 750S UV-vis-NIR spectrophotometer. Fluorescent spectra and lifetime decay test of photoluminescence were captured employing a QuantaMaster 8000 fluorescence spectrometer. Powder X-ray diffraction (PXRD) data were collected on a x'pert3 powder X-ray diffractometer with Cu-K $\alpha$  ( $\lambda = 1.5406 \text{ \AA}$ ) radiation manufactured by PANalytical B.V.. X-ray photoelectron spectroscopy (XPS) was collected on a Thermo Scientific ESCALAB Xi+ spectrometer. Fourier transform infrared (FTIR) spectra were acquired from KBr pellets within the 4000-00 cm<sup>-1</sup> range using a Bruker VERTEX 70 spectrometer.

## Characterizations

### Powder X-ray Diffraction Patterns

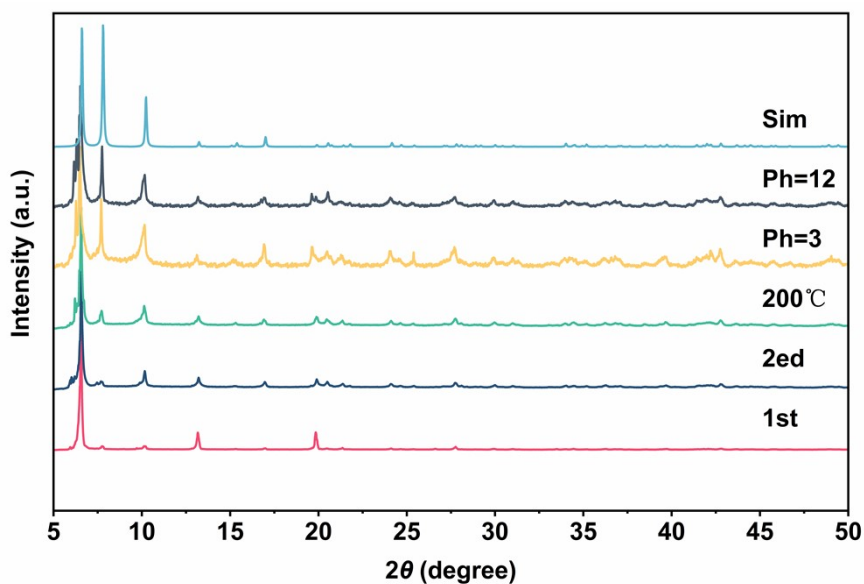

Figure S1. The PXRD patterns of **1a** with different treatments.

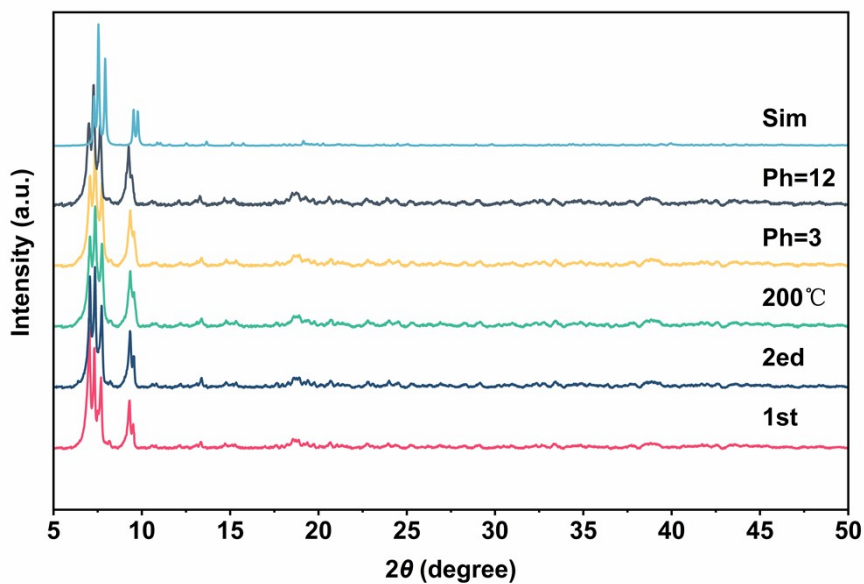

Figure S2. The PXRD patterns of **1c** with different treatments.

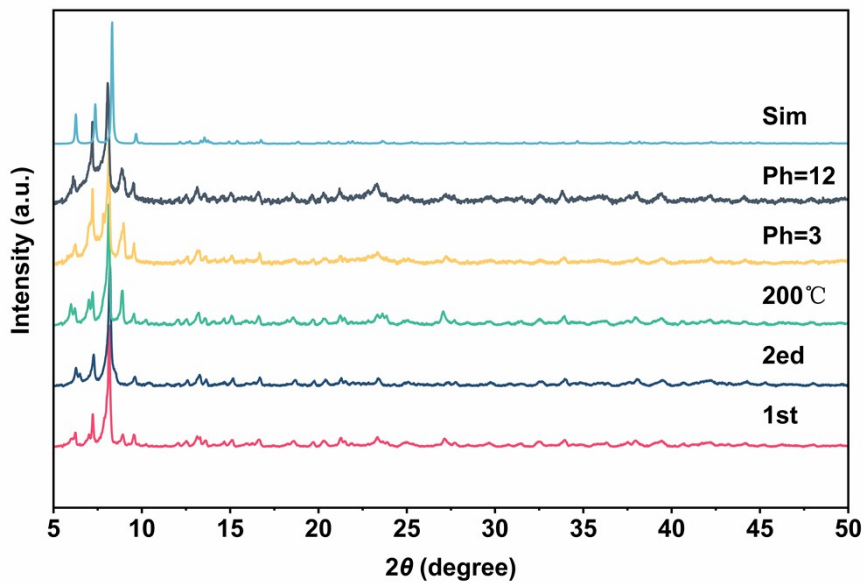

**Figure S3.** The PXRD patterns of **2c** with different treatments.

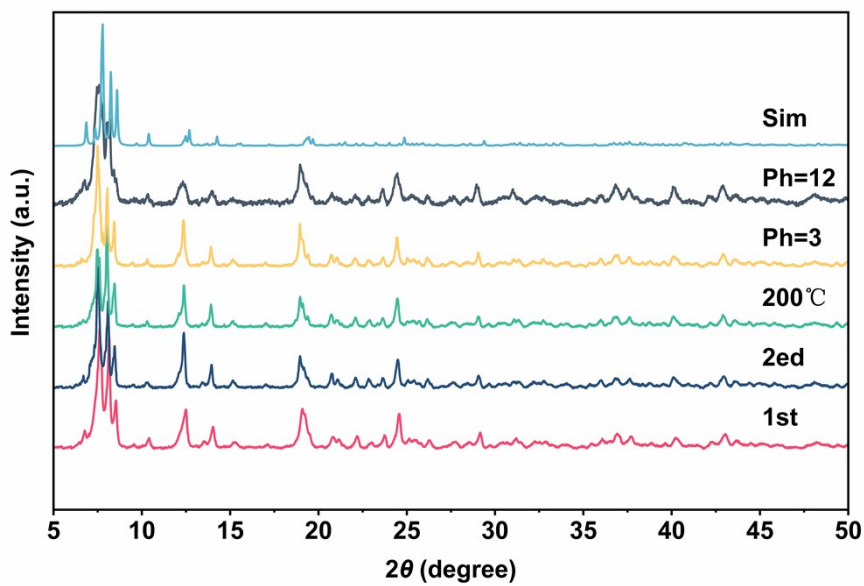

**Figure S4.** The PXRD patterns of **3** with different treatments.

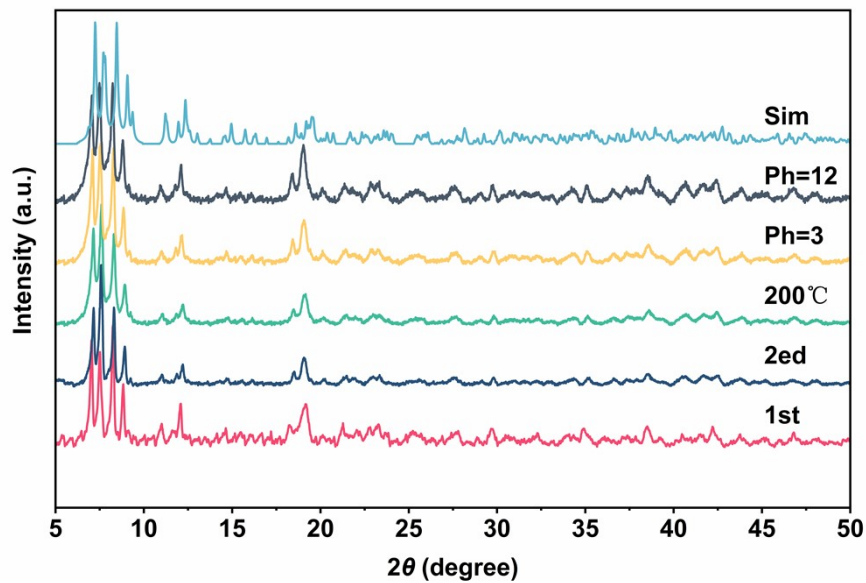

Figure S5. The PXRD patterns of 4 with different treatments.

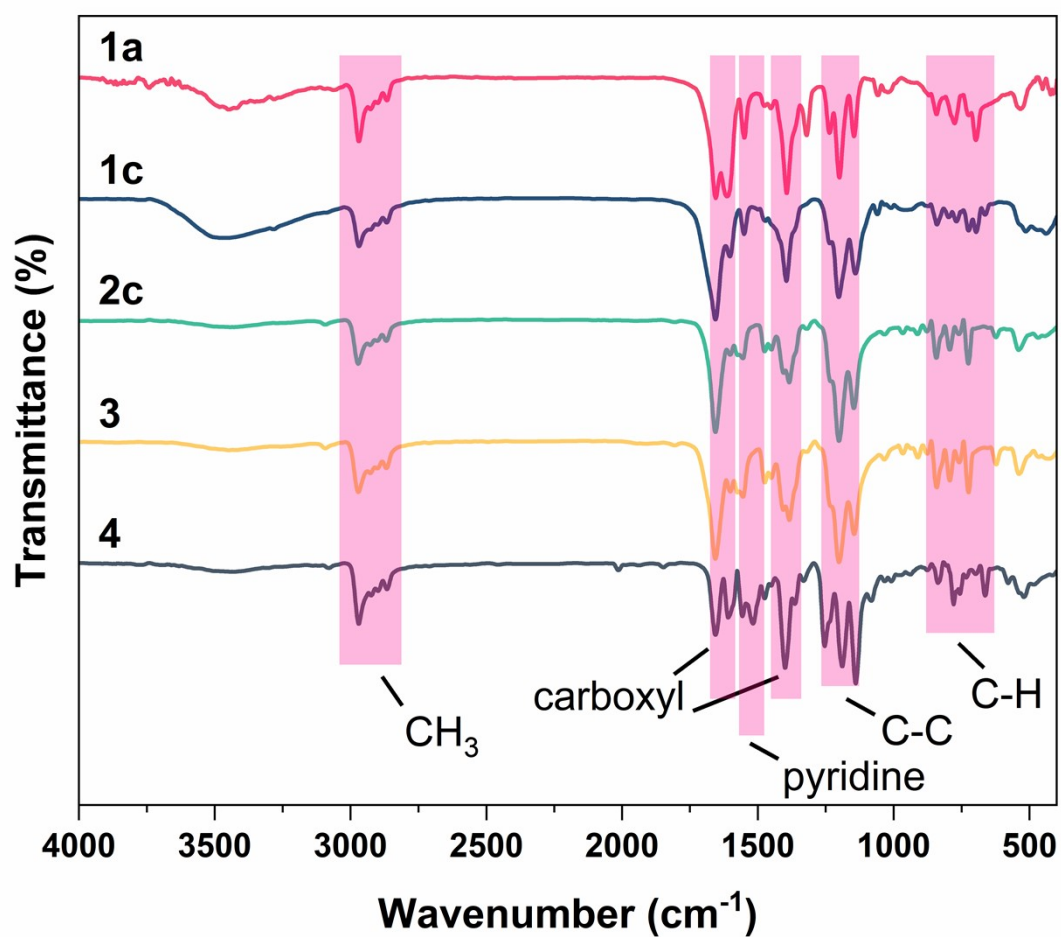

Figure S6. The FT-IR spectra of CACPs.

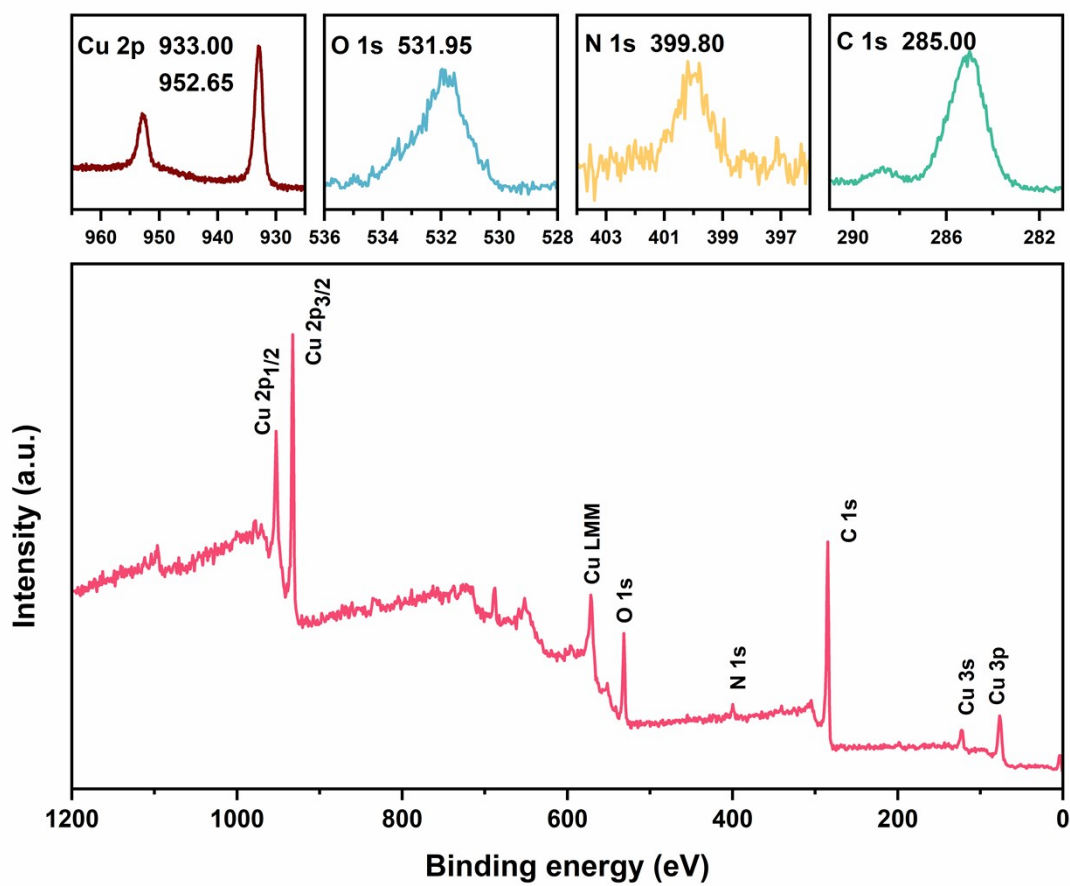

**Figure S7.** XPS spectra of the **1a**, Survey spectrum confirms the presence of all the expected elements (Cu, O, C, and N).

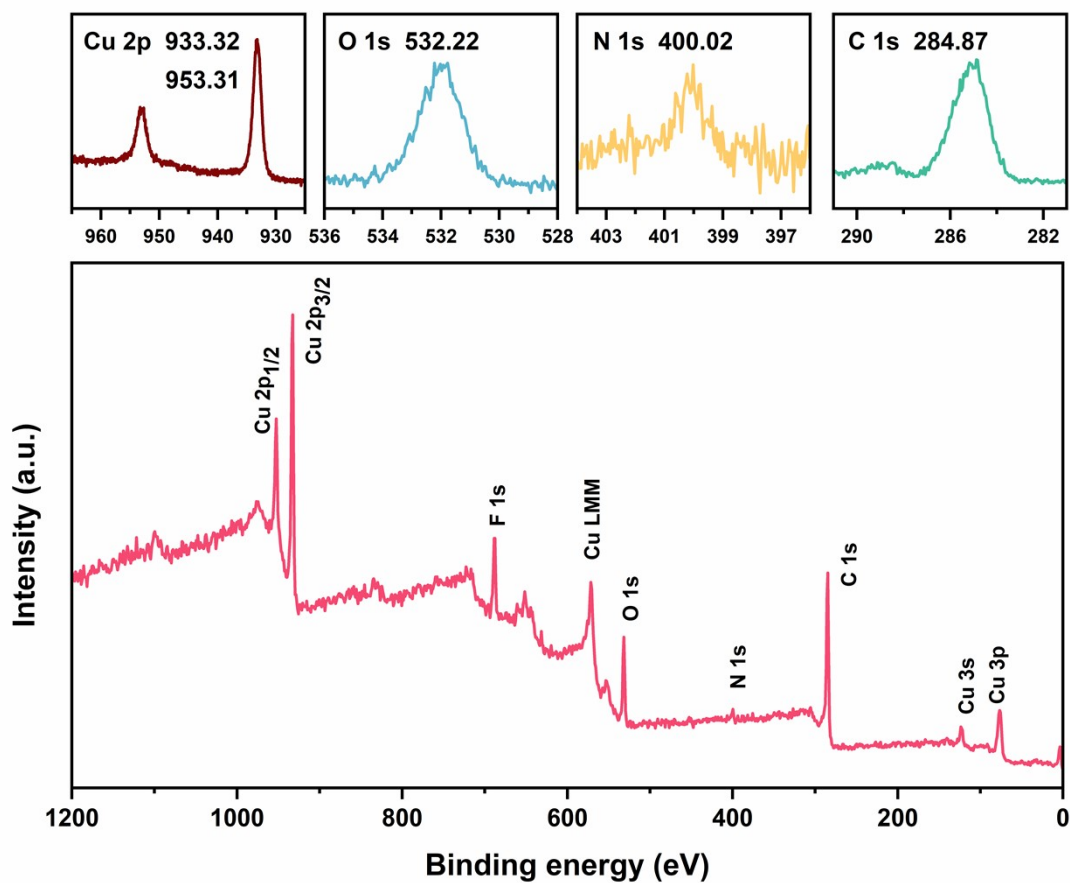

**Figure S8.** XPS spectra of the 2c Survey spectrum confirms the presence of all the expected elements (Cu, O, C, and N).



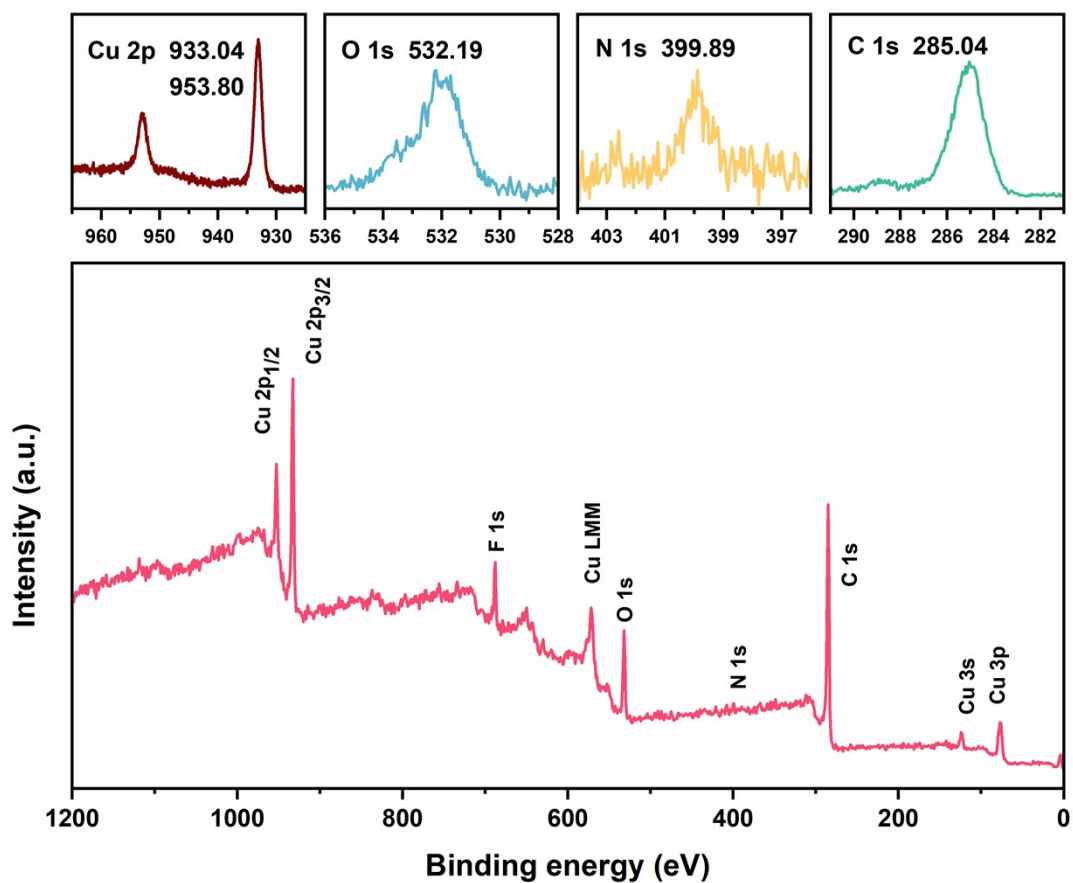

**Figure S9.** XPS spectra of the **4**, Survey spectrum confirms the presence of all the expected elements (Cu, O, C, and N).

## Photophysical Properties

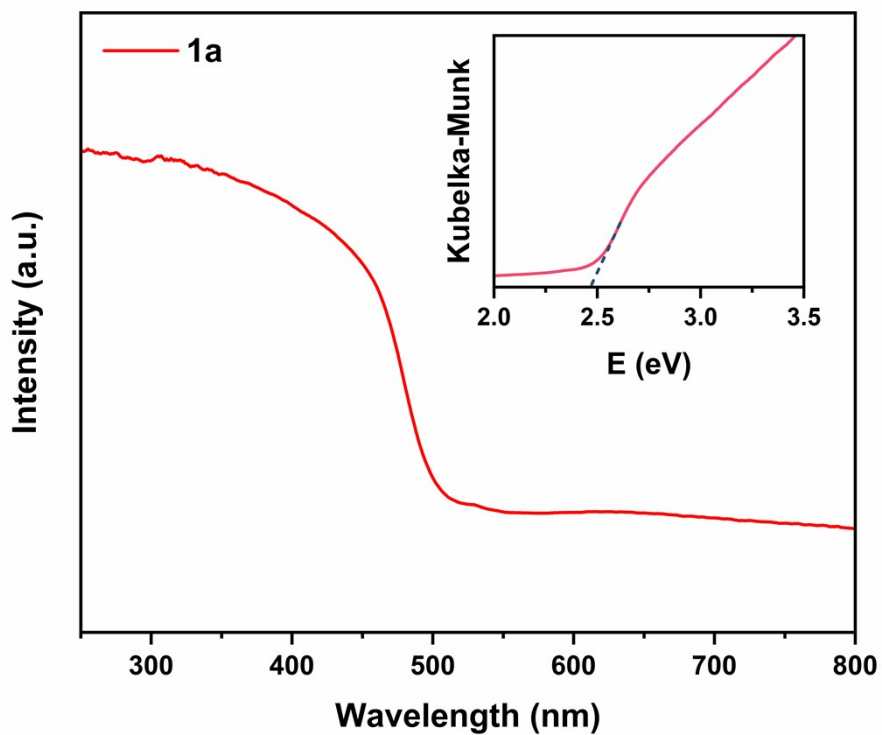

Figure S10. UV-vis absorption spectra of **1a** in the solid state at room temperature.

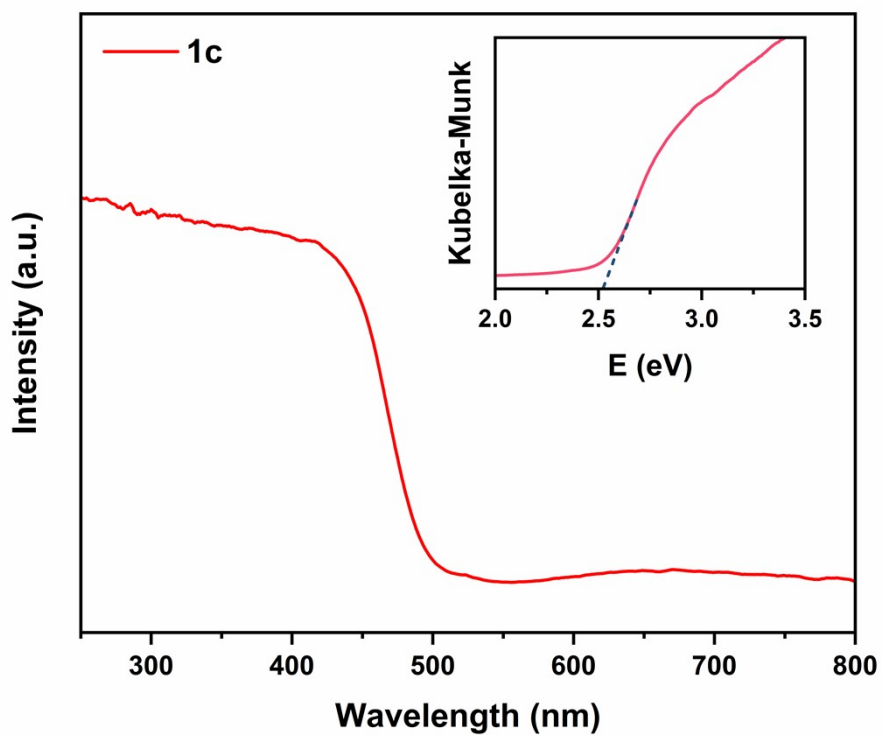

Figure S11. UV-vis absorption spectra of **1c** in the solid state at room temperature.

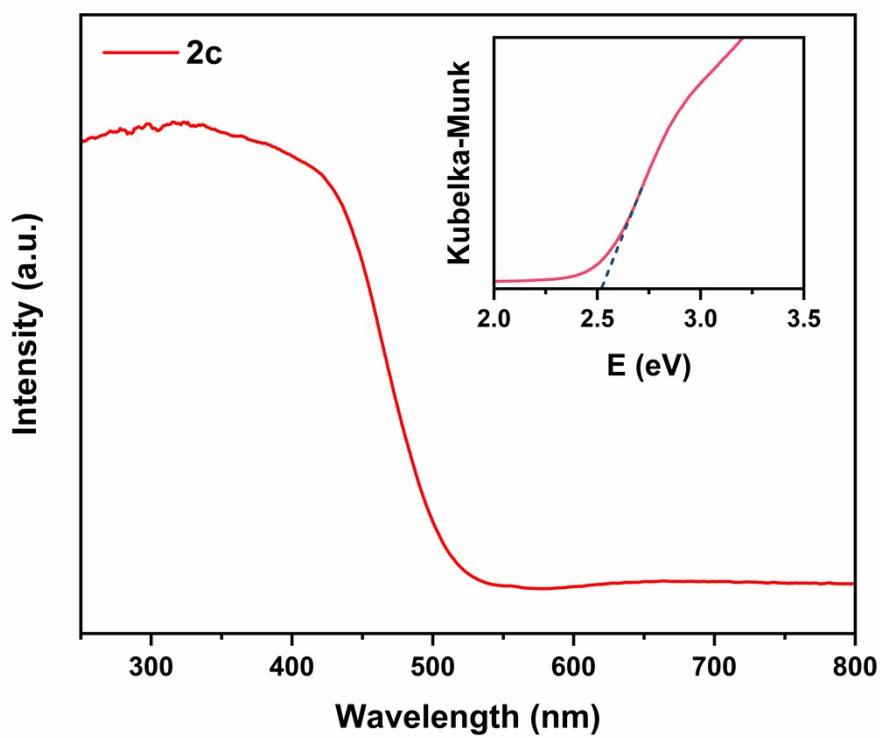

**Figure S12.** UV-vis absorption spectra of **2c** in the solid state at room temperature.

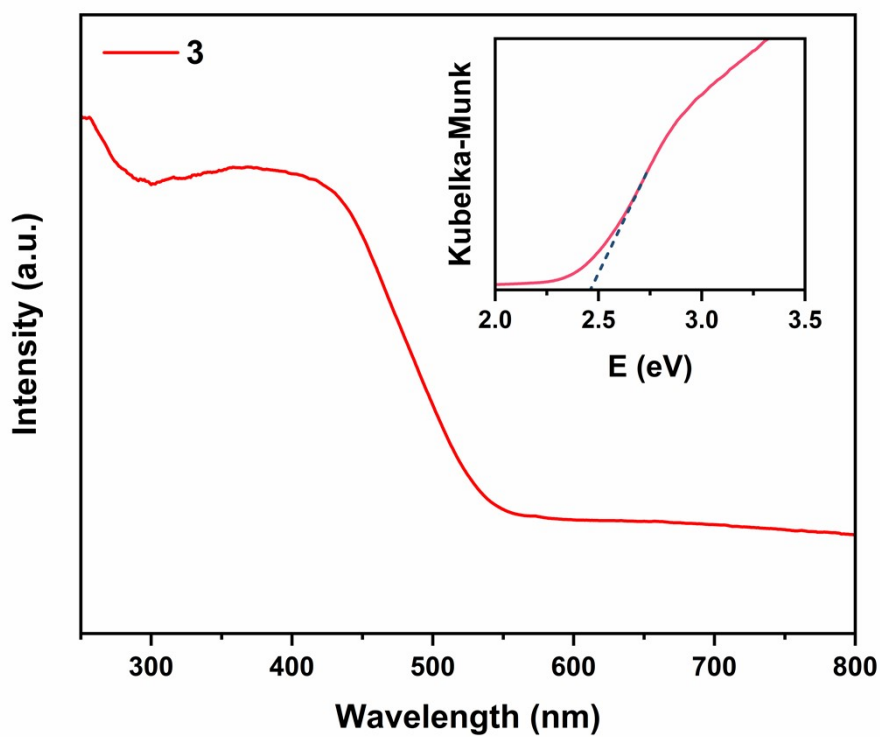

**Figure S13.** UV-vis absorption spectra of **3** in the solid state at room temperature.

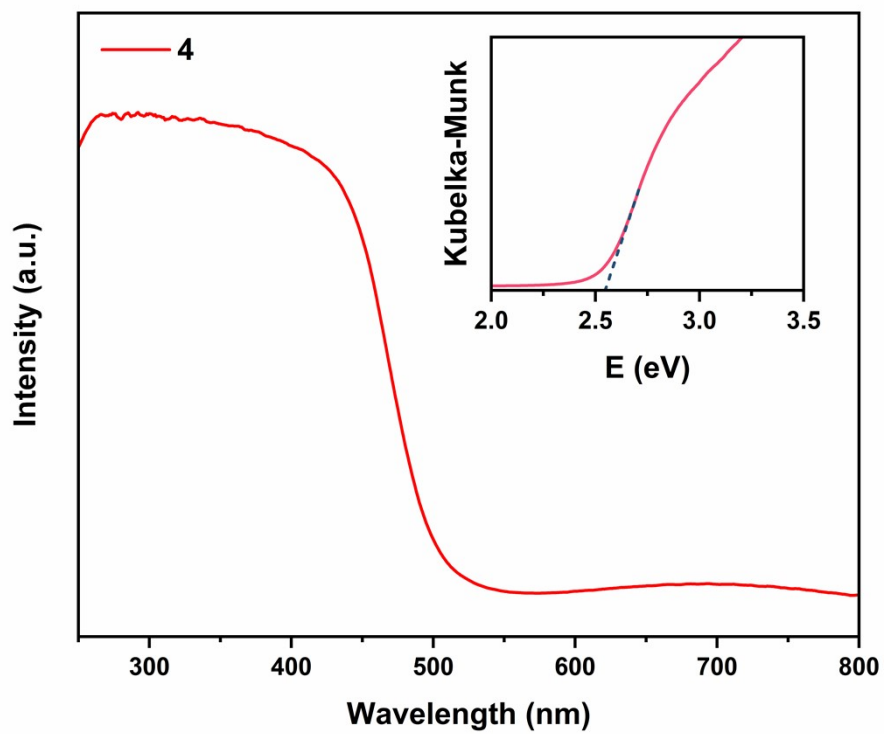

**Figure S14.** UV-vis absorption spectra of **4** in the solid state at room temperature.

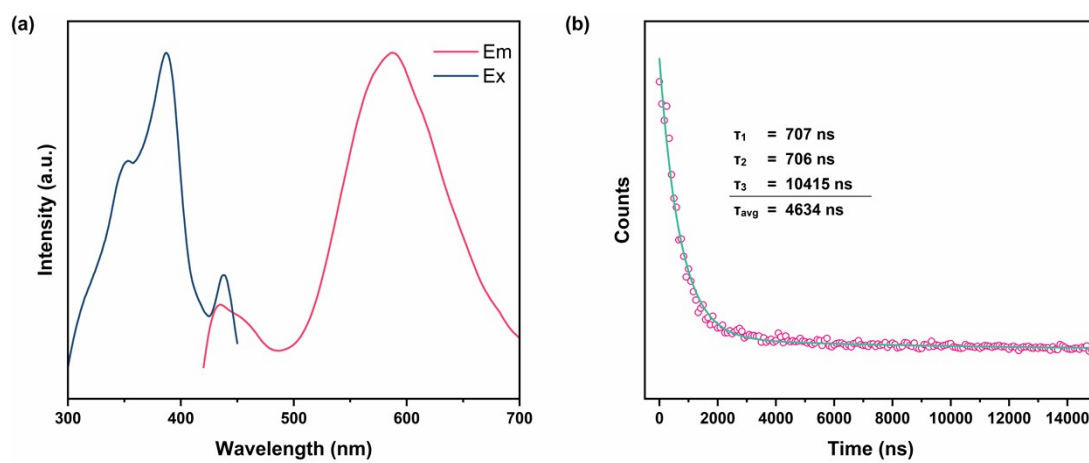

**Figure S15.** Excitation (blue) and emission (red) spectra of **1a** in the solid state;  $\lambda_{\text{ex}} = 387 \text{ nm}$ ,  $\lambda_{\text{em}} = 587 \text{ nm}$ .

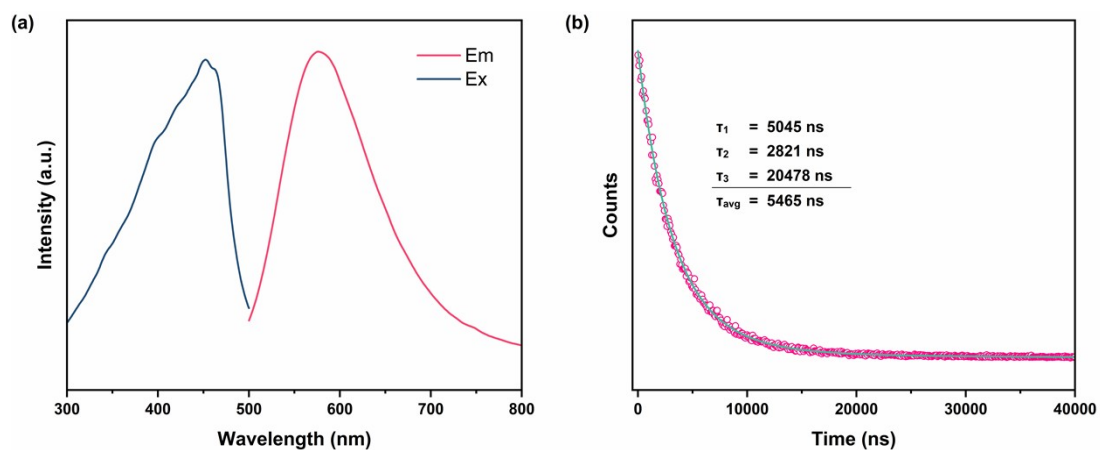

**Figure S16.** Excitation (blue) and emission (red) spectra of **1c** in the solid state;  $\lambda_{\text{ex}}=452$  nm,  $\lambda_{\text{em}}=576$  nm.

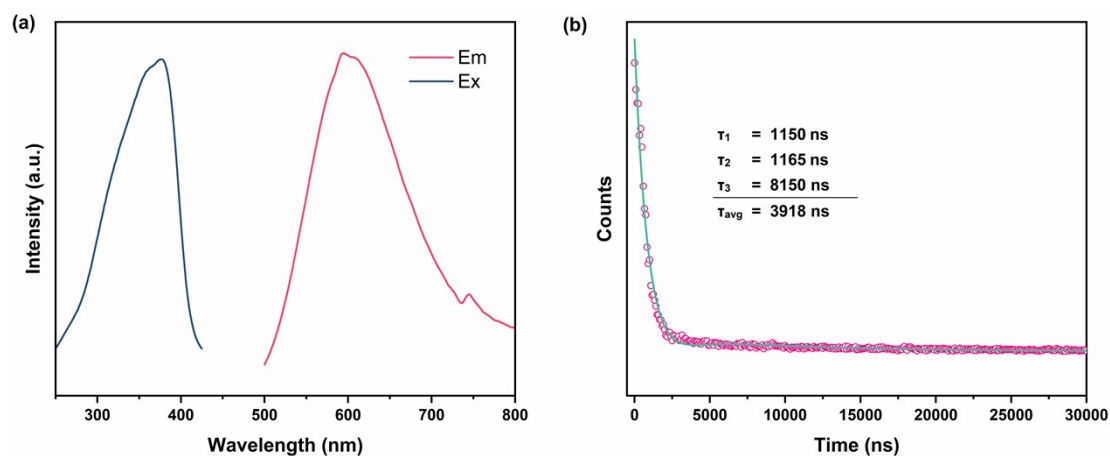

**Figure S17.** Excitation (blue) and emission (red) spectra of **2c** in the solid state;  $\lambda_{\text{ex}}=376$  nm,  $\lambda_{\text{em}}=594$  nm.

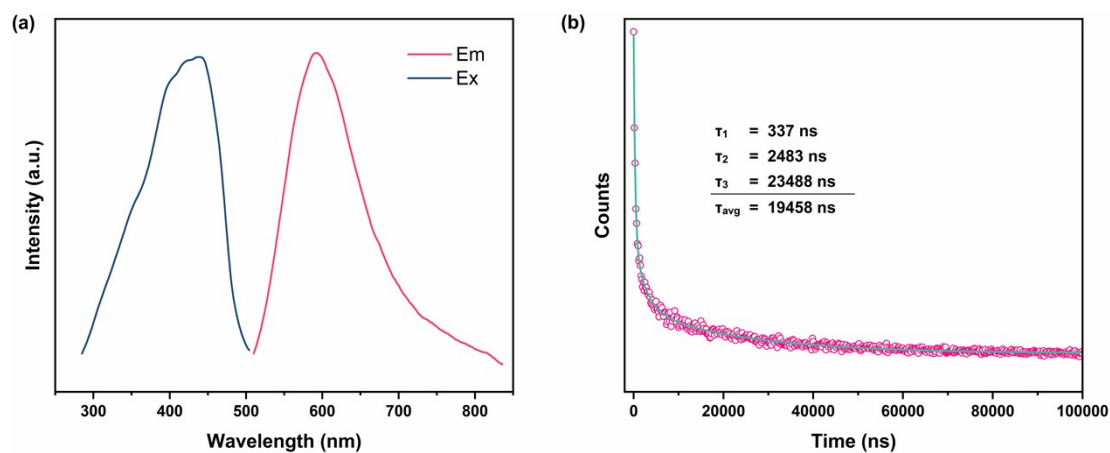

**Figure S18.** Excitation (blue) and emission (red) spectra of **3** in the solid state;  $\lambda_{\text{ex}}=439$  nm,  $\lambda_{\text{em}}=592$  nm.

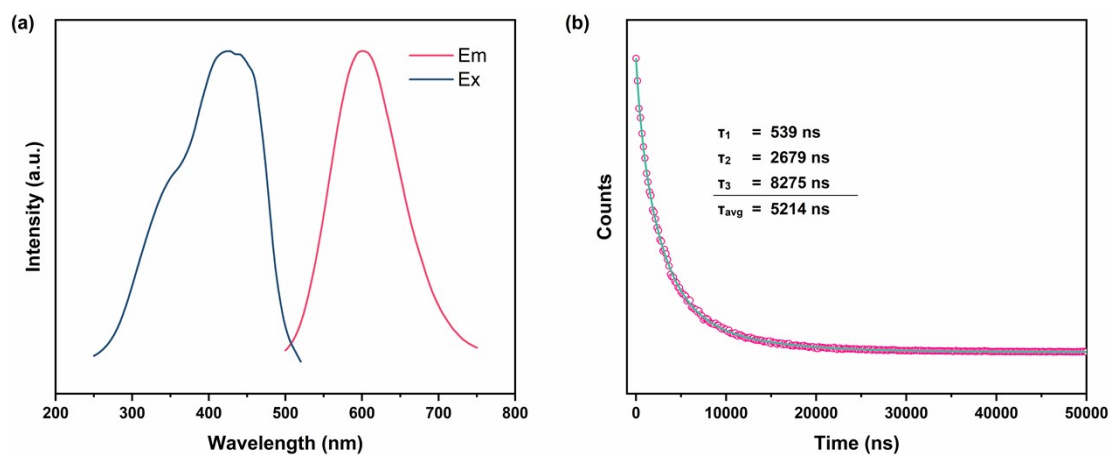

**Figure S19.** Excitation (blue) and emission (red) spectra of **4** in the solid state;  $\lambda_{\text{ex}}=426$  nm,  $\lambda_{\text{em}}=601$  nm.

### Crystal Structure

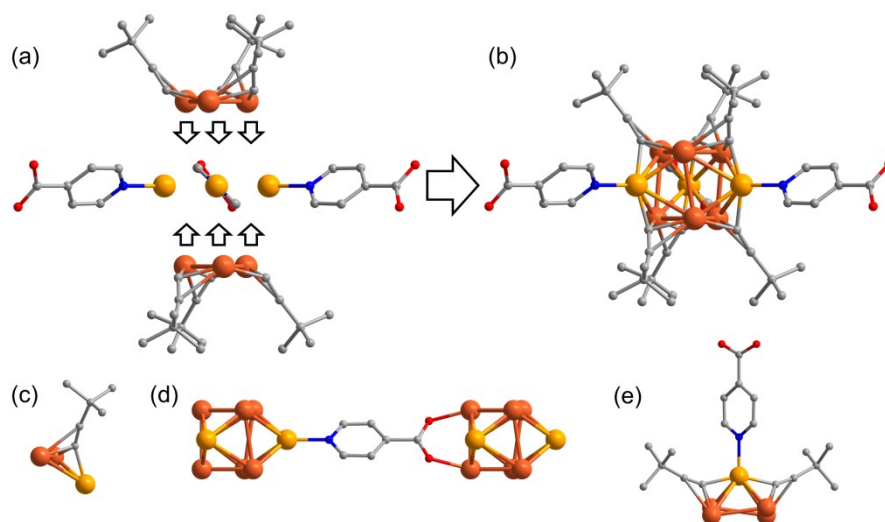

**Figure S20.** (a) and (b) Sandwich-like structures of node in **1a**; (c) Coordination modes of  ${}^t\text{BuC}\equiv\text{C}^-$  in **1a**; (d) Coordination modes of INA in **1a**; (e) Spatial distribution of  ${}^t\text{BuC}\equiv\text{C}^-$  in **1a**, atoms and INA. codes are as follows: rufous, Cu in external layer; yellow, Cu in internal layer; red, O; blue, N; gray, C; green, F. H atoms are omitted for clarity.

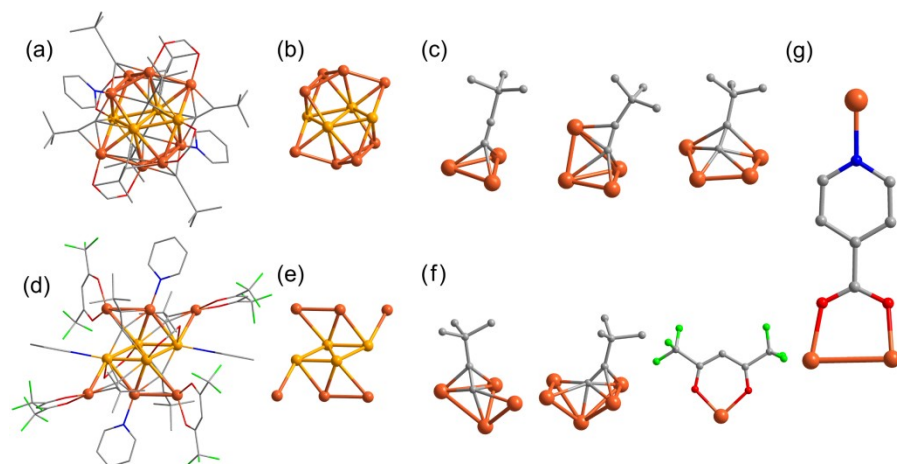

**Figure S21.** (a) Structures of  $\text{Cu}_{12}$  node in **1b**; (b) Core structures of  $\text{Cu}_{12}$  node in **1b**; (c) Coordination modes of  $\text{t-BuC}\equiv\text{C}^-$  in  $\text{Cu}_{12}$  node; (d) Structures of  $\text{Cu}_{10}$  node in **1b**; (e) Core structures of  $\text{Cu}_{10}$  node in **1b**; (f) Coordination modes of hfac in  $\text{Cu}_{10}$  node; (g) Coordination modes of INA in **1b**. codes are as follows: rufous, Cu in external layer; yellow, Cu in internal layer; red, O; blue, N; gray, C; green, F. H atoms are omitted for clarity.

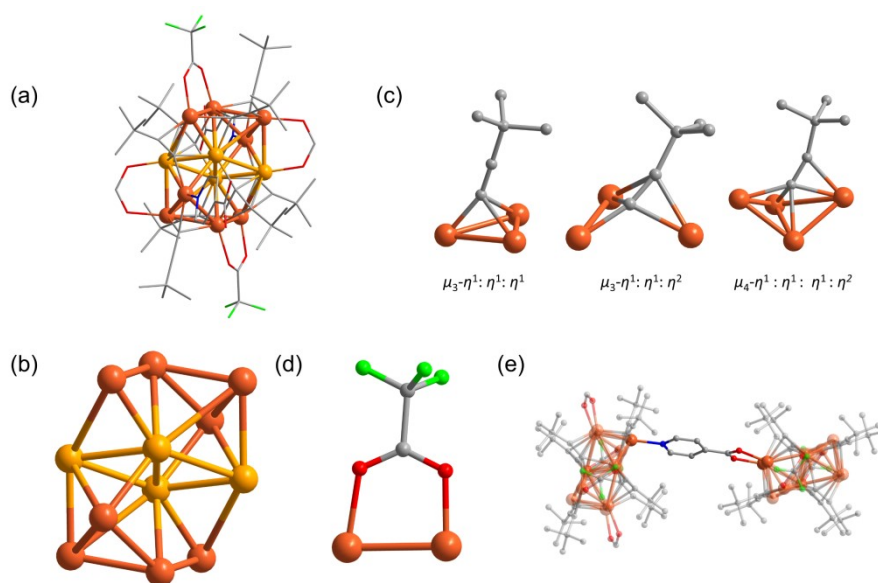

**Figure S22.** (a) Structures of node in **1c**; (b) Core structures of node in **1c**; Coordination modes of (c)  $\text{t-BuC}\equiv\text{C}^-$ ; (d)  $\text{CF}_3\text{CO}_2^-$  and (e) INA in **1c**. codes are as follows: rufous, Cu in external layer; yellow, Cu in internal layer; red, O; blue, N; gray, C; green, F. H atoms are omitted for clarity.

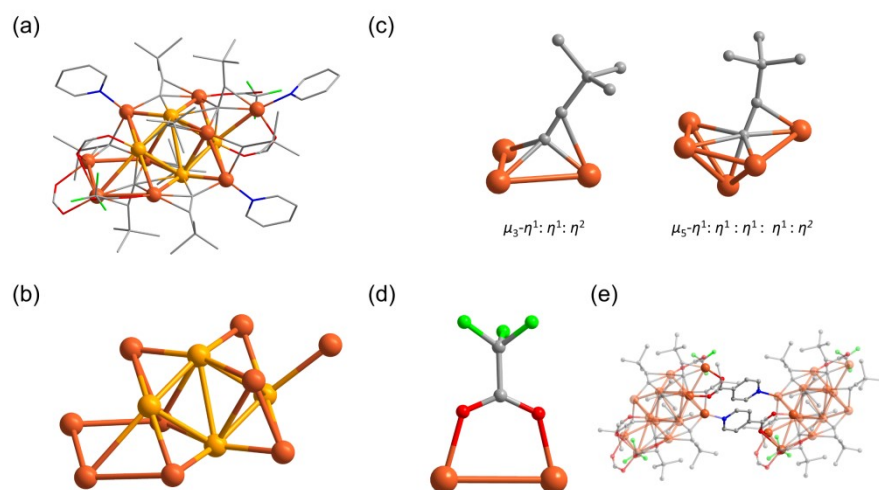

**Figure S23.** (a) Structures of node in **1d**; (b) Core structures of node in **1d**; Coordination modes of (c)  $t\text{BuC}\equiv\text{C}^-$ ; (d)  $\text{CF}_3\text{CO}_2^-$  and (e) INA in **1d**. codes are as follows: rufous, Cu in external layer; yellow, Cu in internal layer; red, O; blue, N; gray, C; green, F. H atoms are omitted for clarity.

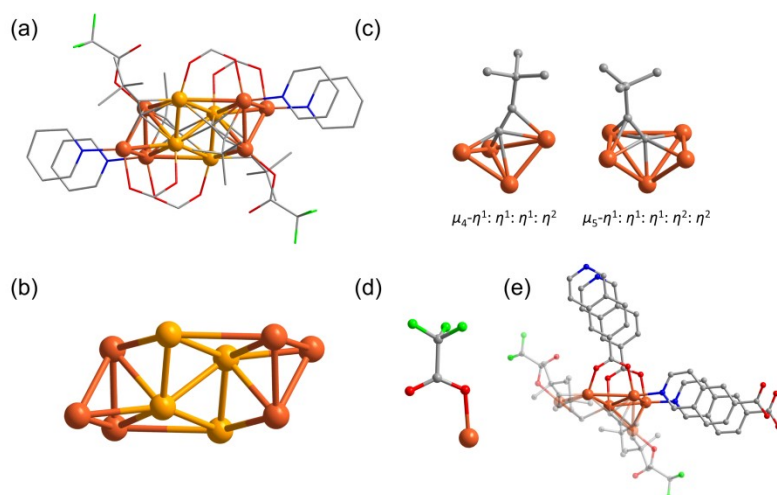

**Figure S24.** (a) Structures of node in **2a**; (b) Core structures of node in **2a**; Coordination modes of (c)  $t\text{BuC}\equiv\text{C}^-$ ; (d)  $\text{CF}_3\text{CO}_2^-$  and (e) IQL in **2a**. codes are as follows: rufous, Cu in external layer; yellow, Cu in internal layer; red, O; blue, N; gray, C; green, F. H atoms are omitted for clarity.



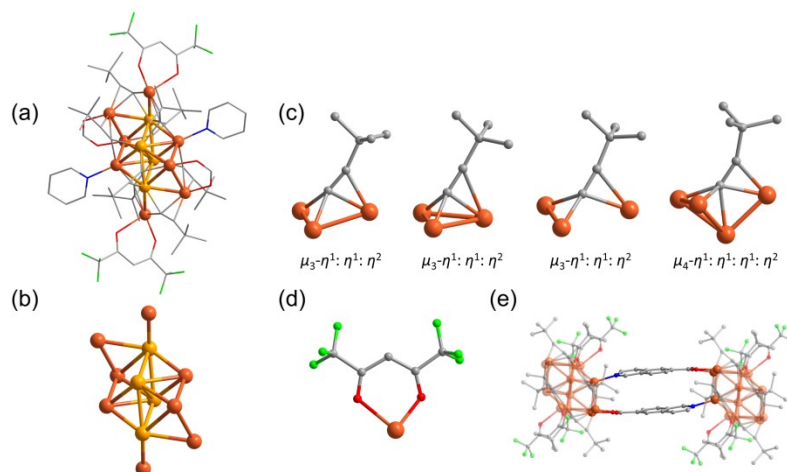

**Figure S25.** (a) Structures of node in **2b**; (b) Core structures of node in **2b**; Coordination modes of (c)  $t\text{BuC}\equiv\text{C}^-$ ; (d) hfac and (e) IQL in **2b**. codes are as follows: rufous, Cu in external layer; yellow, Cu in internal layer; red, O; blue, N; gray, C; green, F. H atoms are omitted for clarity.

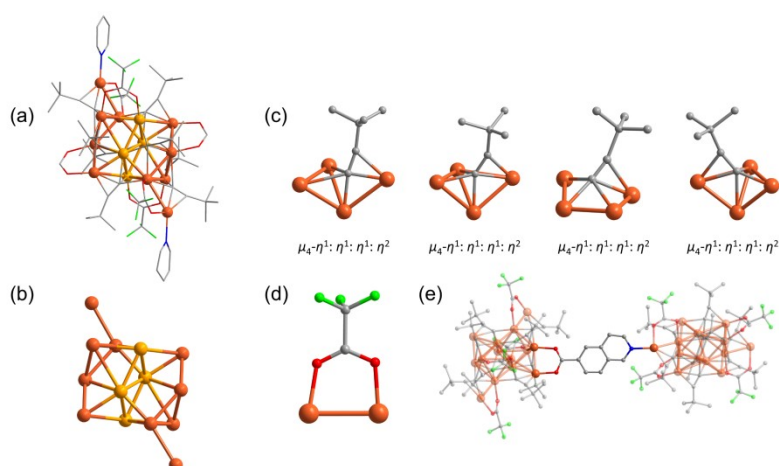

**Figure S26.** (a) Structures of node in **2c**; (b) Core structures of node in **2c**; Coordination modes of (c)  $t\text{BuC}\equiv\text{C}^-$ ; (d)  $\text{CF}_3\text{CO}_2^-$  and (e) IQL in **2c**. codes are as follows: rufous, Cu in external layer; yellow, Cu in internal layer; red, O; blue, N; gray, C; green, F. H atoms are omitted for clarity.

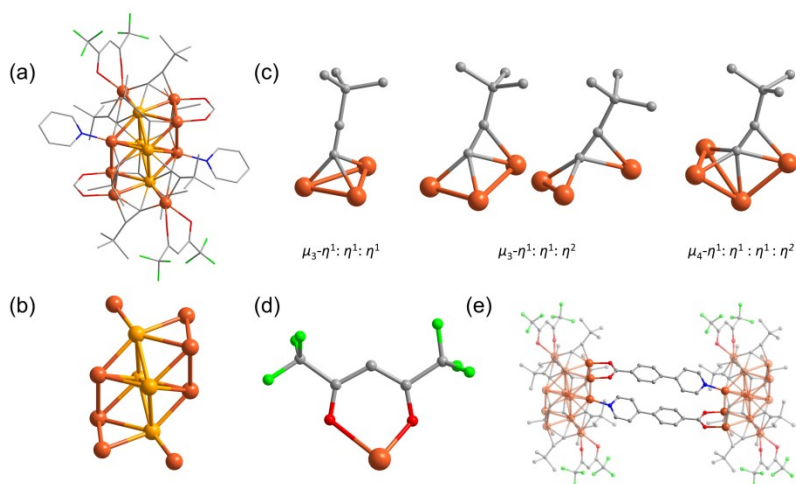

**Figure S27.** (a) Structures of node in **3**; (b) Core structures of node in **3**; Coordination modes of (c)  ${}^t\text{BuC}\equiv\text{C}$ ; (d) hfac and (e) 4-PyBA in **3**. codes are as follows: rufous, Cu in external layer; yellow, Cu in internal layer; red, O; blue, N; gray, C; green, F. H atoms are omitted for clarity.

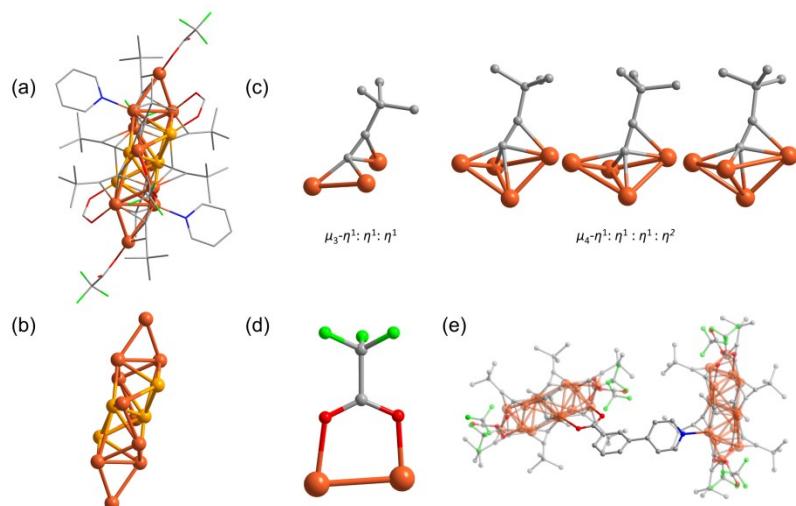

**Figure S28.** (a) Structures of node in **4**; (b) Core structures of node in **4**; Coordination modes of (c)  ${}^t\text{BuC}\equiv\text{C}$ ; (d)  $\text{CF}_3\text{CO}_2^-$  and (e) 3-PyBA in **4**. codes are as follows: rufous, Cu in external layer; yellow, Cu in internal layer; red, O; blue, N; gray, C; green, F. H atoms are omitted for clarity.

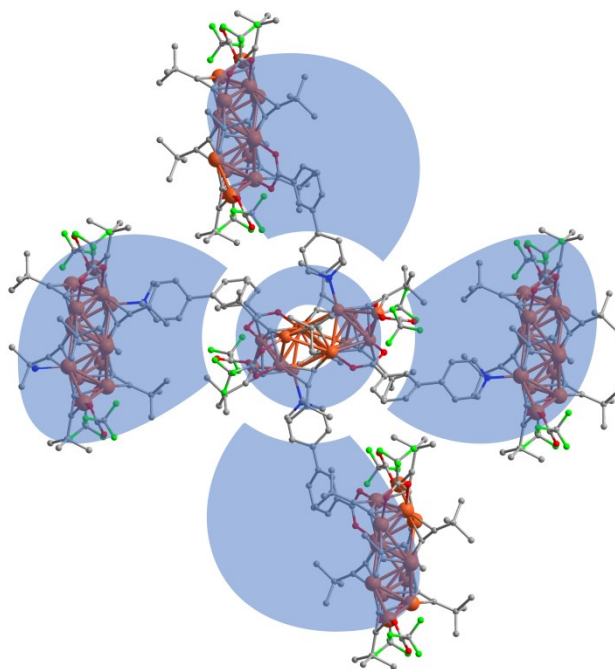

**Figure S29.** Propeller structure of **4**. codes are as follows: rufous, Cu in external layer; yellow, Cu in internal layer; red, O; blue, N; gray, C; green, F. H atoms are omitted for clarity.

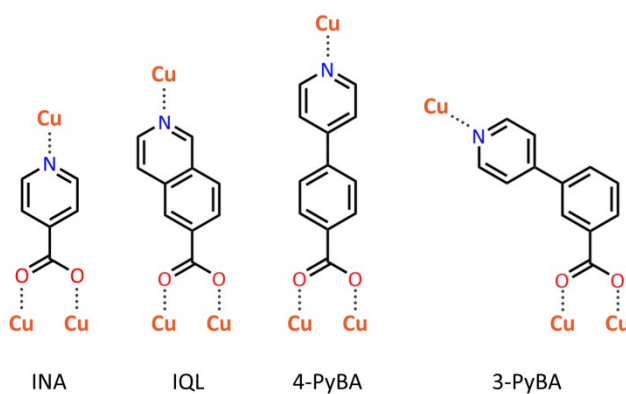

**Figure S30.** Coordination modes of pyridine carboxylic acids with copper.

## Crystal Data

**Table S1.** Crystal data and structure refinement for **1a**.

| Identification code | <b>1a</b>                         |
|---------------------|-----------------------------------|
| Empirical formula   | $C_{18.67}H_{24.67}Cu_3NO_{2.67}$ |
| Formula weight      | 496.35                            |
| Temperature/K       | 291.15                            |
| Crystal system      | trigonal                          |
| Space group         | $P321$                            |

|                                             |                                                                  |
|---------------------------------------------|------------------------------------------------------------------|
| a/Å                                         | 13.067(3)                                                        |
| b/Å                                         | 13.067(3)                                                        |
| c/Å                                         | 13.365(4)                                                        |
| $\alpha$ /°                                 | 90                                                               |
| $\beta$ /°                                  | 90                                                               |
| $\gamma$ /°                                 | 120                                                              |
| Volume/Å <sup>3</sup>                       | 1976.3(11)                                                       |
| Z                                           | 3                                                                |
| $\rho_{\text{calc}}$ /cm <sup>3</sup>       | 1.251                                                            |
| $\mu$ /mm <sup>-1</sup>                     | 2.410                                                            |
| F(000)                                      | 756.0                                                            |
| Crystal size/mm <sup>3</sup>                | 0.1 × 0.1 × 0.05                                                 |
| Radiation                                   | Synchrotron ( $\lambda = 0.6888$ )                               |
| 2 $\Theta$ range for data collection/°      | 6.096 to 50.05                                                   |
| Index ranges                                | -15 ≤ h ≤ 15, -15 ≤ k ≤ 15, -15 ≤ l ≤ 6                          |
| Reflections collected                       | 8221                                                             |
| Independent reflections                     | 2324 [ $R_{\text{int}} = 0.0708$ , $R_{\text{sigma}} = 0.0556$ ] |
| Data/restraints/parameters                  | 2324/201/162                                                     |
| Goodness-of-fit on F <sup>2</sup>           | 1.073                                                            |
| Final R indexes [ $I \geq 2\sigma(I)$ ]     | $R_1 = 0.0570$ , $wR_2 = 0.1457$                                 |
| Final R indexes [all data]                  | $R_1 = 0.0879$ , $wR_2 = 0.1768$                                 |
| Largest diff. peak/hole / e Å <sup>-3</sup> | 0.69/-0.59                                                       |

**Table S2.** Crystal data and structure refinement for **1b**.

| Identification code                   | <b>1b</b>                                                                                                   |
|---------------------------------------|-------------------------------------------------------------------------------------------------------------|
| Empirical formula                     | C <sub>64.42</sub> H <sub>69.04</sub> Cu <sub>11</sub> F <sub>12</sub> N <sub>3.12</sub> O <sub>10.17</sub> |
| Formula weight                        | 1976.64                                                                                                     |
| Temperature/K                         | 273.15                                                                                                      |
| Crystal system                        | triclinic                                                                                                   |
| Space group                           | $P\bar{1}$                                                                                                  |
| a/Å                                   | 14.8797(9)                                                                                                  |
| b/Å                                   | 15.9071(9)                                                                                                  |
| c/Å                                   | 19.7103(13)                                                                                                 |
| $\alpha$ /°                           | 98.802(2)                                                                                                   |
| $\beta$ /°                            | 109.142(2)                                                                                                  |
| $\gamma$ /°                           | 108.741(2)                                                                                                  |
| Volume/Å <sup>3</sup>                 | 3995.8(4)                                                                                                   |
| Z                                     | 2                                                                                                           |
| $\rho_{\text{calc}}$ /cm <sup>3</sup> | 1.643                                                                                                       |

|                                                |                                                                |
|------------------------------------------------|----------------------------------------------------------------|
| $\mu/\text{mm}^{-1}$                           | 2.942                                                          |
| F(000)                                         | 1972.0                                                         |
| Crystal size/ $\text{mm}^3$                    | $0.2 \times 0.2 \times 0.2$                                    |
| Radiation                                      | Synchrotron ( $\lambda = 0.6888$ )                             |
| $2\Theta$ range for data collection/ $^\circ$  | 5.182 to 56.864                                                |
| Index ranges                                   | $-19 \leq h \leq 13, -21 \leq k \leq 21, -21 \leq l \leq 26$   |
| Reflections collected                          | 33691                                                          |
| Independent reflections                        | 19759 [ $R_{\text{int}} = 0.0218, R_{\text{sigma}} = 0.0433$ ] |
| Data/restraints/parameters                     | 19759/1199/1151                                                |
| Goodness-of-fit on $F^2$                       | 1.047                                                          |
| Final R indexes [ $I \geq 2\sigma(I)$ ]        | $R_1 = 0.0368, wR_2 = 0.0935$                                  |
| Final R indexes [all data]                     | $R_1 = 0.0615, wR_2 = 0.1040$                                  |
| Largest diff. peak/hole / $e \text{ \AA}^{-3}$ | 0.48/-0.53                                                     |

**Table S3.** Crystal data and structure refinement for **1c**.

| Identification code                           | <b>1c</b>                                                                   |
|-----------------------------------------------|-----------------------------------------------------------------------------|
| Empirical formula                             | $\text{C}_{69.76}\text{H}_{90}\text{Cu}_{12}\text{F}_6\text{N}_2\text{O}_8$ |
| Formula weight                                | 1961.06                                                                     |
| Temperature/K                                 | 273.15                                                                      |
| Crystal system                                | monoclinic                                                                  |
| Space group                                   | $P2_1/c$                                                                    |
| $a/\text{\AA}$                                | 24.310(3)                                                                   |
| $b/\text{\AA}$                                | 18.0920(19)                                                                 |
| $c/\text{\AA}$                                | 18.612(2)                                                                   |
| $\alpha/^\circ$                               | 90                                                                          |
| $\beta/^\circ$                                | 94.883(4)                                                                   |
| $\gamma/^\circ$                               | 90                                                                          |
| Volume/ $\text{\AA}^3$                        | 8155.9(17)                                                                  |
| Z                                             | 4                                                                           |
| $\rho_{\text{calc}}/\text{g/cm}^3$            | 1.597                                                                       |
| $\mu/\text{mm}^{-1}$                          | 3.121                                                                       |
| F(000)                                        | 3954.0                                                                      |
| Crystal size/ $\text{mm}^3$                   | $0.3 \times 0.1 \times 0.1$                                                 |
| Radiation                                     | Synchrotron ( $\lambda = 0.6888$ )                                          |
| $2\Theta$ range for data collection/ $^\circ$ | 1.682 to 50.724                                                             |
| Index ranges                                  | $-29 \leq h \leq 29, -19 \leq k \leq 20, -22 \leq l \leq 22$                |
| Reflections collected                         | 95455                                                                       |
| Independent reflections                       | 14105 [ $R_{\text{int}} = 0.0635, R_{\text{sigma}} = 0.0420$ ]              |
| Data/restraints/parameters                    | 14105/1013/1005                                                             |

|                                                |                                  |
|------------------------------------------------|----------------------------------|
| Goodness-of-fit on $F^2$                       | 1.099                            |
| Final R indexes [ $I \geq 2\sigma(I)$ ]        | $R_1 = 0.0672$ , $wR_2 = 0.1812$ |
| Final R indexes [all data]                     | $R_1 = 0.0751$ , $wR_2 = 0.1952$ |
| Largest diff. peak/hole / $e \text{ \AA}^{-3}$ | 1.95/-1.93                       |

**Table S4.** Crystal data and structure refinement for **1d**.

| Identification code                            | <b>1d</b>                                                         |
|------------------------------------------------|-------------------------------------------------------------------|
| Empirical formula                              | $C_{70}H_{84}Cu_{13}F_6N_3O_{10}$                                 |
| Formula weight                                 | 2067.42                                                           |
| Temperature/K                                  | 273.15                                                            |
| Crystal system                                 | triclinic                                                         |
| Space group                                    | $P\bar{1}$                                                        |
| a/ $\text{\AA}$                                | 13.1388(12)                                                       |
| b/ $\text{\AA}$                                | 13.5488(15)                                                       |
| c/ $\text{\AA}$                                | 14.2759(13)                                                       |
| $\alpha/^\circ$                                | 62.883(3)                                                         |
| $\beta/^\circ$                                 | 80.888(3)                                                         |
| $\gamma/^\circ$                                | 70.396(3)                                                         |
| Volume/ $\text{\AA}^3$                         | 2130.8(4)                                                         |
| Z                                              | 1                                                                 |
| $\rho_{\text{calc}}/\text{g/cm}^3$             | 1.611                                                             |
| $\mu/\text{mm}^{-1}$                           | 3.233                                                             |
| F(000)                                         | 1036.0                                                            |
| Crystal size/ $\text{mm}^3$                    | $0.3 \times 0.2 \times 0.2$                                       |
| Radiation                                      | synchrotron ( $\lambda = 0.6888$ )                                |
| $2\Theta$ range for data collection/ $^\circ$  | 5.51 to 50.826                                                    |
| Index ranges                                   | $-15 \leq h \leq 15$ , $-16 \leq k \leq 9$ , $-17 \leq l \leq 16$ |
| Reflections collected                          | 13533                                                             |
| Independent reflections                        | 7409 [ $R_{\text{int}} = 0.0390$ , $R_{\text{sigma}} = 0.0773$ ]  |
| Data/restraints/parameters                     | 7409/819/649                                                      |
| Goodness-of-fit on $F^2$                       | 1.070                                                             |
| Final R indexes [ $I \geq 2\sigma(I)$ ]        | $R_1 = 0.0772$ , $wR_2 = 0.2312$                                  |
| Final R indexes [all data]                     | $R_1 = 0.1227$ , $wR_2 = 0.2662$                                  |
| Largest diff. peak/hole / $e \text{ \AA}^{-3}$ | 3.16/-0.93                                                        |

**Table S5.** Crystal data and structure refinement for **2a**.

| Identification code | <b>2a</b>                         |
|---------------------|-----------------------------------|
| Empirical formula   | $C_{78}H_{78}Cu_{10}F_6N_6O_{14}$ |

|                                                |                                                                   |
|------------------------------------------------|-------------------------------------------------------------------|
| Formula weight                                 | 2072.86                                                           |
| Temperature/K                                  | 273.15                                                            |
| Crystal system                                 | triclinic                                                         |
| Space group                                    | $P\bar{1}$                                                        |
| a/Å                                            | 11.6633(7)                                                        |
| b/Å                                            | 18.9908(12)                                                       |
| c/Å                                            | 20.1994(13)                                                       |
| $\alpha/^\circ$                                | 81.451(2)                                                         |
| $\beta/^\circ$                                 | 89.413(2)                                                         |
| $\gamma/^\circ$                                | 74.577(2)                                                         |
| Volume/Å <sup>3</sup>                          | 4263.0(5)                                                         |
| Z                                              | 2                                                                 |
| $\rho_{\text{calc}}/\text{g}/\text{cm}^3$      | 1.615                                                             |
| $\mu/\text{mm}^{-1}$                           | 2.516                                                             |
| F(000)                                         | 2088.0                                                            |
| Crystal size/mm <sup>3</sup>                   | 0.2 × 0.2 × 0.2                                                   |
| Radiation                                      | Synchrotron ( $\lambda = 0.6888$ )                                |
| 2 $\Theta$ range for data collection/ $^\circ$ | 3.258 to 50.742                                                   |
| Index ranges                                   | -14 ≤ h ≤ 13, -22 ≤ k ≤ 22, -24 ≤ l ≤ 24                          |
| Reflections collected                          | 50189                                                             |
| Independent reflections                        | 13997 [ $R_{\text{int}} = 0.0513$ , $R_{\text{sigma}} = 0.0503$ ] |
| Data/restraints/parameters                     | 13997/228/913                                                     |
| Goodness-of-fit on F <sup>2</sup>              | 1.052                                                             |
| Final R indexes [ $I \geq 2\sigma(I)$ ]        | $R_1 = 0.0721$ , $wR_2 = 0.1925$                                  |
| Final R indexes [all data]                     | $R_1 = 0.0868$ , $wR_2 = 0.2119$                                  |
| Largest diff. peak/hole / e Å <sup>-3</sup>    | 1.27/-0.98                                                        |

**Table S6.** Crystal data and structure refinement for **2b**.

| Identification code | <b>2b</b>                                                                      |
|---------------------|--------------------------------------------------------------------------------|
| Empirical formula   | C <sub>39</sub> H <sub>43</sub> Cu <sub>6</sub> F <sub>6</sub> NO <sub>4</sub> |
| Formula weight      | 1084.98                                                                        |
| Temperature/K       | 273.15                                                                         |
| Crystal system      | triclinic                                                                      |
| Space group         | $P\bar{1}$                                                                     |
| a/Å                 | 12.6843(10)                                                                    |
| b/Å                 | 14.1427(9)                                                                     |
| c/Å                 | 14.7359(10)                                                                    |
| $\alpha/^\circ$     | 115.220(3)                                                                     |
| $\beta/^\circ$      | 97.199(2)                                                                      |

|                                               |                                                               |
|-----------------------------------------------|---------------------------------------------------------------|
| $\gamma/^\circ$                               | 111.483(2)                                                    |
| Volume/ $\text{\AA}^3$                        | 2097.4(3)                                                     |
| Z                                             | 2                                                             |
| $\rho_{\text{calc}}/\text{g/cm}^3$            | 1.718                                                         |
| $\mu/\text{mm}^{-1}$                          | 3.053                                                         |
| F(000)                                        | 1088.0                                                        |
| Crystal size/ $\text{mm}^3$                   | $0.2 \times 0.2 \times 0.2$                                   |
| Radiation                                     | Synchrotron ( $\lambda = 0.6888$ )                            |
| $2\Theta$ range for data collection/ $^\circ$ | 3.242 to 50.72                                                |
| Index ranges                                  | $-15 \leq h \leq 15, -17 \leq k \leq 16, -17 \leq l \leq 17$  |
| Reflections collected                         | 19018                                                         |
| Independent reflections                       | 6855 [ $R_{\text{int}} = 0.0642, R_{\text{sigma}} = 0.0802$ ] |
| Data/restraints/parameters                    | 6855/187/545                                                  |
| Goodness-of-fit on $F^2$                      | 1.066                                                         |
| Final R indexes [ $I \geq 2\sigma(I)$ ]       | $R_1 = 0.1275, wR_2 = 0.3268$                                 |
| Final R indexes [all data]                    | $R_1 = 0.1309, wR_2 = 0.3380$                                 |
| Largest diff. peak/hole / $e \text{\AA}^{-3}$ | 2.62/-2.02                                                    |

**Table S7.** Crystal data and structure refinement for **2c**.

| Identification code                           | <b>2c</b>                                                                      |
|-----------------------------------------------|--------------------------------------------------------------------------------|
| Empirical formula                             | $\text{C}_{76}\text{H}_{84}\text{Cu}_{14}\text{F}_{12}\text{N}_2\text{O}_{12}$ |
| Formula weight                                | 2335.01                                                                        |
| Temperature/K                                 | 273.15                                                                         |
| Crystal system                                | orthorhombic                                                                   |
| Space group                                   | $Pca2_1$                                                                       |
| a/ $\text{\AA}$                               | 13.0606(8)                                                                     |
| b/ $\text{\AA}$                               | 23.9965(14)                                                                    |
| c/ $\text{\AA}$                               | 28.2045(16)                                                                    |
| $\alpha/^\circ$                               | 90                                                                             |
| $\beta/^\circ$                                | 90                                                                             |
| $\gamma/^\circ$                               | 90                                                                             |
| Volume/ $\text{\AA}^3$                        | 8839.5(9)                                                                      |
| Z                                             | 4                                                                              |
| $\rho_{\text{calc}}/\text{g/cm}^3$            | 1.755                                                                          |
| $\mu/\text{mm}^{-1}$                          | 3.371                                                                          |
| F(000)                                        | 4656.0                                                                         |
| Crystal size/ $\text{mm}^3$                   | $0.3 \times 0.2 \times 0.2$                                                    |
| Radiation                                     | Synchrotron ( $\lambda = 0.6888$ )                                             |
| $2\Theta$ range for data collection/ $^\circ$ | 3.35 to 50.73                                                                  |



|                                                |                                                                |
|------------------------------------------------|----------------------------------------------------------------|
| Index ranges                                   | $-15 \leq h \leq 15, -28 \leq k \leq 28, -33 \leq l \leq 34$   |
| Reflections collected                          | 105319                                                         |
| Independent reflections                        | 16064 [ $R_{\text{int}} = 0.0771, R_{\text{sigma}} = 0.0521$ ] |
| Data/restraints/parameters                     | 16064/986/1073                                                 |
| Goodness-of-fit on $F^2$                       | 1.086                                                          |
| Final R indexes [ $I \geq 2\sigma(I)$ ]        | $R_1 = 0.0689, wR_2 = 0.1647$                                  |
| Final R indexes [all data]                     | $R_1 = 0.0841, wR_2 = 0.1770$                                  |
| Largest diff. peak/hole / $e \text{ \AA}^{-3}$ | 1.12/-1.51                                                     |

**Table S8.** Crystal data and structure refinement for **3**.

|                                                |                                                               |
|------------------------------------------------|---------------------------------------------------------------|
| Identification code                            | <b>3</b>                                                      |
| Empirical formula                              | $C_{41}H_{45}Cu_6F_6NO_4$                                     |
| Formula weight                                 | 1111.02                                                       |
| Temperature/K                                  | 273.15                                                        |
| Crystal system                                 | triclinic                                                     |
| Space group                                    | $P\bar{1}$                                                    |
| a/ $\text{\AA}$                                | 13.3217(5)                                                    |
| b/ $\text{\AA}$                                | 14.0632(5)                                                    |
| c/ $\text{\AA}$                                | 14.6193(6)                                                    |
| $\alpha/^\circ$                                | 62.3950(10)                                                   |
| $\beta/^\circ$                                 | 81.8880(10)                                                   |
| $\gamma/^\circ$                                | 64.9420(10)                                                   |
| Volume/ $\text{\AA}^3$                         | 2193.45(15)                                                   |
| Z                                              | 2                                                             |
| $\rho_{\text{calc}}/\text{g/cm}^3$             | 1.682                                                         |
| $\mu/\text{mm}^{-1}$                           | 2.921                                                         |
| F(000)                                         | 1116.0                                                        |
| Crystal size/ $\text{mm}^3$                    | $0.1 \times 0.1 \times 0.1$                                   |
| Radiation                                      | Synchrotron ( $\lambda = 0.6888$ )                            |
| $2\Theta$ range for data collection/ $^\circ$  | 3.152 to 50.734                                               |
| Index ranges                                   | $-13 \leq h \leq 12, -16 \leq k \leq 16, -16 \leq l \leq 16$  |
| Reflections collected                          | 20313                                                         |
| Independent reflections                        | 6083 [ $R_{\text{int}} = 0.0387, R_{\text{sigma}} = 0.0362$ ] |
| Data/restraints/parameters                     | 6083/206/552                                                  |
| Goodness-of-fit on $F^2$                       | 1.079                                                         |
| Final R indexes [ $I \geq 2\sigma(I)$ ]        | $R_1 = 0.0425, wR_2 = 0.1447$                                 |
| Final R indexes [all data]                     | $R_1 = 0.0435, wR_2 = 0.1462$                                 |
| Largest diff. peak/hole / $e \text{ \AA}^{-3}$ | 1.00/-0.78                                                    |

**Table S9.** Crystal data and structure refinement for **4**.

|                                             |                                                                                                          |
|---------------------------------------------|----------------------------------------------------------------------------------------------------------|
| Identification code                         | <b>4</b>                                                                                                 |
| Empirical formula                           | C <sub>78.19</sub> H <sub>88</sub> Cu <sub>12.5</sub> F <sub>7.66</sub> N <sub>2</sub> O <sub>9.91</sub> |
| Formula weight                              | 2154.24                                                                                                  |
| Temperature/K                               | 100.00(10)                                                                                               |
| Crystal system                              | monoclinic                                                                                               |
| Space group                                 | C2/c                                                                                                     |
| a/Å                                         | 23.8539(2)                                                                                               |
| b/Å                                         | 15.62430(10)                                                                                             |
| c/Å                                         | 24.1728(2)                                                                                               |
| α/°                                         | 90                                                                                                       |
| β/°                                         | 108.4950(10)                                                                                             |
| γ/°                                         | 90                                                                                                       |
| Volume/Å <sup>3</sup>                       | 8543.90(12)                                                                                              |
| Z                                           | 4                                                                                                        |
| ρ <sub>calc</sub> /g/cm <sup>3</sup>        | 1.675                                                                                                    |
| μ/mm <sup>-1</sup>                          | 3.869                                                                                                    |
| F(000)                                      | 4328.0                                                                                                   |
| Crystal size/mm <sup>3</sup>                | 0.35 × 0.3 × 0.15                                                                                        |
| Radiation                                   | Cu Kα (λ = 1.54184)                                                                                      |
| 2θ range for data collection/°              | 6.876 to 149.034                                                                                         |
| Index ranges                                | -28 ≤ h ≤ 29, -19 ≤ k ≤ 13, -30 ≤ l ≤ 28                                                                 |
| Reflections collected                       | 48339                                                                                                    |
| Independent reflections                     | 8599 [R <sub>int</sub> = 0.0527, R <sub>sigma</sub> = 0.0235]                                            |
| Data/restraints/parameters                  | 8599/279/639                                                                                             |
| Goodness-of-fit on F <sup>2</sup>           | 1.099                                                                                                    |
| Final R indexes [I >= 2σ (I)]               | R <sub>1</sub> = 0.0484, wR <sub>2</sub> = 0.1385                                                        |
| Final R indexes [all data]                  | R <sub>1</sub> = 0.0497, wR <sub>2</sub> = 0.1395                                                        |
| Largest diff. peak/hole / e Å <sup>-3</sup> | 1.02/-0.55                                                                                               |

$$R_1 = \frac{\sum ||F_o| - |F_c||}{\sum |F_o|}, wR_2 = \left[ \frac{\sum w(F_o^2 - F_c^2)^2}{\sum w(F_o^2)^2} \right]^{1/2}$$

**Table S10.** Bond lengths (Å) of **1a**.

| Atom | Atom             | Length/Å   | Atom | Atom             | Length/Å  |
|------|------------------|------------|------|------------------|-----------|
| Cu1  | Cu1 <sup>1</sup> | 2.668(3)   | Cu3  | Cu1 <sup>3</sup> | 2.883(2)  |
| Cu1  | Cu1 <sup>2</sup> | 2.668(3)   | Cu3  | Cu11             | 2.883(2)  |
| Cu1  | Cu1 <sup>3</sup> | 2.898(4)   | Cu3  | N4               | 2.040(15) |
| Cu1  | Cu3 <sup>2</sup> | 2.883(2)   | Cu3  | C2               | 2.000(12) |
| Cu1  | Cu3              | 2.4932(19) | Cu3  | C25              | 2.000(12) |

| Atom | Atom             | Length/Å   | Atom | Atom             | Length/Å  |
|------|------------------|------------|------|------------------|-----------|
| Cu1  | O9 <sup>4</sup>  | 2.136(8)   | O9   | Cu16             | 2.136(8)  |
| Cu1  | C2               | 2.009(11)  | C8   | O95              | 1.274(12) |
| Cu1  | C2 <sup>2</sup>  | 2.036(10)  | C2   | Cu1 <sup>1</sup> | 2.036(10) |
| Cu1  | C10 <sup>2</sup> | 2.482(14)  | C10  | Cu1 <sup>1</sup> | 2.482(14) |
| Cu3  | Cu1 <sup>5</sup> | 2.4932(19) | C1   | O3               | 1.41(3)   |

<sup>1</sup>+Y-X,-X,+Z; <sup>2</sup>-Y,+X-Y,+Z; <sup>3</sup>-X,-X+Y,-Z; <sup>4</sup>-Y+X,1-Y,-Z; <sup>5</sup>+Y,+X,-Z; <sup>6</sup>1-Y+X,1-Y,-Z

**Table S11.** Bond lengths (Å) of **1b**.

| Atom | Atom              | Length/Å   | Atom | Atom              | Length/Å  |
|------|-------------------|------------|------|-------------------|-----------|
| Cu3  | Cu2               | 2.6497(5)  | Cu58 | C59               | 2.111(3)  |
| Cu3  | Cu2 <sup>1</sup>  | 2.5373(5)  | Cu58 | C66               | 2.036(3)  |
| Cu3  | Cu4               | 2.7830(5)  | Cu58 | O57               | 1.948(2)  |
| Cu3  | C5                | 2.071(3)   | Cu58 | C65               | 2.050(3)  |
| Cu3  | Cu6               | 2.9204(6)  | Cu41 | Cu41 <sup>3</sup> | 2.5748(8) |
| Cu3  | O92               | 2.183(2)   | Cu41 | Cu39              | 2.7763(5) |
| Cu3  | C83               | 2.058(3)   | Cu41 | Cu39 <sup>3</sup> | 2.8225(6) |
| Cu3  | N54 <sup>2</sup>  | 2.055(2)   | Cu41 | C59               | 1.974(3)  |
| Cu2  | Cu3 <sup>1</sup>  | 2.5373(5)  | Cu41 | C42               | 1.949(3)  |
| Cu2  | Cu2 <sup>1</sup>  | 2.5826(7)  | Cu41 | C66               | 2.469(3)  |
| Cu2  | Cu4 <sup>1</sup>  | 2.4958(5)  | Cu41 | Cu71 <sup>3</sup> | 2.8271(6) |
| Cu2  | Cu1               | 2.9151(6)  | Cu39 | Cu41 <sup>3</sup> | 2.8224(6) |
| Cu2  | C5 <sup>1</sup>   | 2.289(3)   | Cu39 | C42 <sup>3</sup>  | 2.091(3)  |
| Cu2  | O94               | 1.9762(19) | Cu39 | C66               | 2.030(3)  |
| Cu2  | C83               | 2.023(3)   | Cu39 | Cu71              | 2.7652(7) |
| Cu2  | C83 <sup>1</sup>  | 2.536(3)   | Cu39 | O38               | 2.006(2)  |
| Cu48 | Cu40 <sup>3</sup> | 2.6553(5)  | Cu39 | C43 <sup>3</sup>  | 2.435(3)  |
| Cu48 | Cu58              | 2.7656(6)  | C59  | Cu71 <sup>3</sup> | 2.098(3)  |
| Cu48 | Cu41              | 2.6918(6)  | Cu1  | Cu4 <sup>1</sup>  | 2.7640(6) |
| Cu48 | C59               | 2.415(3)   | Cu1  | O101              | 1.993(2)  |
| Cu48 | C42 <sup>3</sup>  | 2.158(3)   | Cu1  | O105              | 1.986(3)  |
| Cu48 | C72 <sup>3</sup>  | 2.194(3)   | Cu1  | C83               | 2.021(3)  |
| Cu48 | Cu71 <sup>3</sup> | 2.5700(6)  | Cu1  | C84               | 2.041(3)  |
| Cu48 | O49               | 2.019(2)   | C42  | Cu48 <sup>3</sup> | 2.158(3)  |
| Cu48 | C43 <sup>3</sup>  | 2.246(3)   | C42  | Cu39 <sup>3</sup> | 2.091(3)  |
| Cu40 | Cu48 <sup>3</sup> | 2.6554(5)  | C72  | Cu48 <sup>3</sup> | 2.194(3)  |
| Cu40 | Cu41              | 2.5612(5)  | C72  | Cu71              | 2.058(3)  |
| Cu40 | Cu39              | 2.6930(6)  | C5   | Cu2 <sup>1</sup>  | 2.289(3)  |
| Cu40 | C42               | 2.515(3)   | C5   | Cu6               | 2.035(3)  |
| Cu40 | C66               | 1.976(3)   | O11  | Cu6               | 2.008(3)  |

|      |                  |           |      |                   |           |
|------|------------------|-----------|------|-------------------|-----------|
| Cu40 | C72              | 2.005(3)  | Cu71 | Cu48 <sup>3</sup> | 2.5701(6) |
| Cu40 | Cu71             | 2.8747(6) | Cu71 | Cu41 <sup>3</sup> | 2.8271(6) |
| Cu40 | N98 <sup>4</sup> | 2.096(2)  | Cu71 | C59 <sup>3</sup>  | 2.098(3)  |
| Cu4  | Cu2 <sup>1</sup> | 2.4958(5) | Cu71 | O82               | 1.963(2)  |
| Cu4  | Cu1 <sup>1</sup> | 2.7640(6) | Cu71 | C60 <sup>3</sup>  | 2.472(4)  |
| Cu4  | C5               | 2.096(3)  | Cu6  | O7                | 2.026(3)  |
| Cu4  | N31              | 1.991(2)  | Cu6  | C26               | 2.03(3)   |
| Cu4  | C83 <sup>1</sup> | 2.148(3)  | Cu6  | C2                | 1.988(17) |
| Cu4  | C84 <sup>1</sup> | 2.113(3)  | C84  | Cu4 <sup>1</sup>  | 2.113(3)  |
| Cu58 | Cu41             | 2.5371(5) | C60  | Cu71 <sup>3</sup> | 2.472(4)  |
| Cu58 | Cu39             | 2.9837(6) |      |                   |           |

<sup>1</sup>2-X,1-Y,2-Z; <sup>2</sup>1-X,1-Y,1-Z; <sup>3</sup>-X,-Y,1-Z; <sup>4</sup>1-X,-Y,1-Z

**Table S12.** Bond lengths (Å) of **1c**.

| Atom | Atom              | Length/Å   | Atom | Atom              | Length/Å   |
|------|-------------------|------------|------|-------------------|------------|
| Cu5  | Cu5 <sup>1</sup>  | 2.5247(12) | Cu57 | Cu68              | 2.6430(9)  |
| Cu5  | Cu7 <sup>1</sup>  | 2.6813(8)  | Cu57 | Cu50 <sup>3</sup> | 2.7156(10) |
| Cu5  | Cu1 <sup>1</sup>  | 2.5338(8)  | Cu57 | N64 <sup>4</sup>  | 2.086(5)   |
| Cu5  | Cu11 <sup>1</sup> | 2.4371(9)  | Cu57 | C75               | 1.925(5)   |
| Cu5  | Cu4               | 2.7853(9)  | Cu57 | C56               | 1.952(6)   |
| Cu5  | Cu4 <sup>1</sup>  | 2.6361(9)  | Cu58 | Cu47              | 2.9670(9)  |
| Cu5  | C12 <sup>1</sup>  | 2.227(5)   | Cu58 | Cu68              | 2.6963(11) |
| Cu5  | C27               | 2.050(5)   | Cu58 | Cu50 <sup>3</sup> | 2.5658(9)  |
| Cu5  | C6                | 1.931(5)   | Cu58 | O59               | 1.945(4)   |
| Cu7  | Cu1 <sup>1</sup>  | 2.7409(9)  | Cu58 | C75               | 2.056(5)   |
| Cu7  | Cu3 <sup>1</sup>  | 2.5619(9)  | Cu58 | C70               | 2.053(5)   |
| Cu7  | Cu11              | 2.6057(8)  | Cu58 | C69               | 2.126(6)   |
| Cu7  | O8                | 2.078(4)   | Cu47 | Cu47 <sup>3</sup> | 2.5561(13) |
| Cu7  | C27 <sup>1</sup>  | 2.165(5)   | Cu47 | Cu68              | 2.9466(10) |
| Cu7  | C2 <sup>1</sup>   | 2.245(5)   | Cu47 | Cu68 <sup>3</sup> | 2.6554(8)  |
| Cu7  | C6                | 2.128(5)   | Cu47 | Cu50 <sup>3</sup> | 2.6352(9)  |
| Cu7  | C22               | 2.184(5)   | Cu47 | Cu54 <sup>3</sup> | 2.4755(10) |
| Cu1  | Cu3               | 2.6881(9)  | Cu47 | C56 <sup>3</sup>  | 2.234(6)   |
| Cu1  | Cu4               | 2.6698(9)  | Cu47 | C70               | 2.037(5)   |
| Cu1  | N39 <sup>2</sup>  | 2.069(4)   | Cu47 | C48 <sup>3</sup>  | 2.548(5)   |
| Cu1  | C12               | 1.980(5)   | Cu47 | C48               | 1.917(5)   |
| Cu1  | C2                | 1.936(5)   | Cu68 | Cu54              | 3.0579(10) |
| Cu3  | Cu4               | 2.6897(10) | Cu68 | O67               | 1.976(4)   |
| Cu3  | O35               | 1.950(4)   | Cu68 | C56               | 2.069(6)   |
| Cu3  | C27               | 2.043(5)   | Cu68 | C48               | 2.059(5)   |
| Cu3  | C2                | 2.058(5)   | Cu68 | C49               | 2.322(6)   |

|      |                   |           |      |                  |            |
|------|-------------------|-----------|------|------------------|------------|
| Cu3  | C28               | 2.086(5)  | Cu50 | Cu54             | 2.6299(11) |
| Cu11 | O10               | 1.937(4)  | Cu50 | O51              | 2.058(5)   |
| Cu11 | C12               | 2.048(5)  | Cu50 | C75 <sup>3</sup> | 2.196(6)   |
| Cu11 | C27 <sup>1</sup>  | 2.054(5)  | Cu50 | C70 <sup>3</sup> | 2.202(5)   |
| Cu11 | C13               | 2.012(5)  | Cu50 | C48              | 2.136(5)   |
| Cu4  | O33               | 1.962(4)  | Cu50 | C49              | 2.268(6)   |
| Cu4  | C12               | 2.040(5)  | Cu54 | O53              | 1.949(5)   |
| Cu4  | C6                | 2.047(5)  | Cu54 | C56              | 2.041(6)   |
| Cu4  | C22               | 2.417(5)  | Cu54 | C70 <sup>3</sup> | 2.021(5)   |
| Cu57 | Cu58              | 2.7866(9) | Cu54 | C55              | 2.010(6)   |
| Cu57 | Cu47 <sup>3</sup> | 2.5046(9) |      |                  |            |

<sup>1</sup>-X,2-Y,1-Z; <sup>2</sup>-X,1/2+Y,3/2-Z; <sup>3</sup>1-X,1-Y,1-Z; <sup>4</sup>+X,3/2-Y,1/2+Z

**Table S13.** Bond lengths (Å) of **1d**.

| Atom | Atom             | Length/Å   | Atom | Atom             | Length/Å   |
|------|------------------|------------|------|------------------|------------|
| Cu3  | Cu4              | 2.6726(17) | Cu2  | C17 <sup>1</sup> | 2.30(4)    |
| Cu3  | Cu4 <sup>1</sup> | 2.7350(15) | Cu2  | C20              | 2.161(6)   |
| Cu3  | Cu2              | 2.6926(17) | Cu7  | Cu3 <sup>1</sup> | 2.6778(18) |
| Cu3  | Cu7 <sup>1</sup> | 2.6779(18) | Cu7  | C6               | 2.043(10)  |
| Cu3  | O37              | 2.014(6)   | Cu7  | O8               | 1.932(9)   |
| Cu3  | C26              | 2.039(9)   | Cu7  | C32 <sup>1</sup> | 2.174(10)  |
| Cu3  | C32              | 1.936(10)  | Cu7  | C5               | 2.04(6)    |
| Cu4  | Cu3 <sup>1</sup> | 2.7350(15) | Cu7  | C1C              | 2.14(2)    |
| Cu4  | Cu5              | 2.5329(17) | Cu1  | O35              | 2.218(9)   |
| Cu4  | Cu2 <sup>1</sup> | 2.6728(17) | Cu1  | Cu34             | 2.679(7)   |
| Cu4  | Cu2              | 2.8853(18) | Cu1  | O46              | 2.02(2)    |
| Cu4  | Cu7              | 2.6293(18) | Cu1  | C20              | 1.928(6)   |
| Cu4  | C6               | 1.955(11)  | Cu1  | C1I              | 2.065(17)  |
| Cu4  | C26              | 1.913(9)   | O35  | Cu34             | 2.358(8)   |
| Cu4  | C32 <sup>1</sup> | 2.471(9)   | N41  | Cu5 <sup>2</sup> | 2.005(8)   |
| Cu5  | Cu2              | 2.6166(19) | C26  | Cu2 <sup>1</sup> | 2.051(9)   |
| Cu5  | C6               | 1.987(11)  | C32  | Cu4 <sup>1</sup> | 2.471(9)   |
| Cu5  | N41 <sup>2</sup> | 2.005(8)   | C32  | Cu7 <sup>1</sup> | 2.174(10)  |
| Cu5  | C20              | 2.062(6)   | C32  | Cu34             | 2.106(9)   |
| Cu2  | Cu4 <sup>1</sup> | 2.6728(17) | C33  | Cu34             | 2.019(11)  |
| Cu2  | Cu1              | 3.041(3)   | Cu34 | O44              | 2.024(19)  |
| Cu2  | C26 <sup>1</sup> | 2.051(9)   | Cu51 | N50              | 2.02(2)    |
| Cu2  | C32              | 2.320(10)  | C10  | Cu2 <sup>1</sup> | 2.172(18)  |
| Cu2  | C10 <sup>1</sup> | 2.172(18)  | C17  | Cu2 <sup>1</sup> | 2.30(4)    |

<sup>1</sup>1-X,1-Y,1-Z; <sup>2</sup>-X,1-Y,1-Z

**Table S14.** Bond lengths (Å) of **2a**.

| Atom | Atom              | Length/Å   | Atom | Atom              | Length/Å   |
|------|-------------------|------------|------|-------------------|------------|
| Cu01 | Cu01 <sup>1</sup> | 2.5174(16) | Cu05 | Cu09              | 2.6822(14) |
| Cu01 | Cu02              | 2.9092(11) | Cu05 | O00M              | 1.977(7)   |
| Cu01 | Cu03              | 2.8235(11) | Cu05 | C00Z              | 2.154(7)   |
| Cu01 | Cu03 <sup>1</sup> | 2.5434(12) | Cu05 | C01D              | 2.054(7)   |
| Cu01 | Cu04              | 2.5441(11) | Cu05 | C01M              | 2.045(7)   |
| Cu01 | Cu0A              | 2.5625(12) | Cu06 | Cu07 <sup>4</sup> | 2.8511(11) |
| Cu01 | O00C              | 1.983(5)   | Cu06 | Cu09 <sup>4</sup> | 3.0233(12) |
| Cu01 | C00R              | 2.050(6)   | Cu06 | O00E <sup>4</sup> | 2.042(5)   |
| Cu01 | C00R <sup>1</sup> | 2.279(7)   | Cu06 | N00J              | 1.983(6)   |
| Cu01 | C019              | 2.368(7)   | Cu06 | C00Z <sup>4</sup> | 2.042(8)   |
| Cu02 | Cu04              | 2.6813(12) | Cu06 | C01M <sup>4</sup> | 2.130(8)   |
| Cu02 | Cu0A              | 3.0065(11) | Cu07 | Cu07 <sup>3</sup> | 2.5040(19) |
| Cu02 | O00B              | 2.042(5)   | Cu07 | Cu08              | 2.8400(13) |
| Cu02 | N00I              | 1.994(6)   | Cu07 | Cu08 <sup>3</sup> | 2.5448(12) |
| Cu02 | C00R              | 2.039(7)   | Cu07 | Cu09              | 2.6302(14) |
| Cu02 | C013              | 2.137(7)   | Cu07 | O00F              | 1.979(6)   |
| Cu03 | Cu04 <sup>1</sup> | 3.0318(12) | Cu07 | C00Z              | 2.060(7)   |
| Cu03 | O00D              | 1.947(5)   | Cu07 | C00Z <sup>3</sup> | 2.260(7)   |
| Cu03 | C00R              | 2.040(7)   | Cu07 | C01D              | 2.457(7)   |
| Cu03 | C019 <sup>1</sup> | 2.083(8)   | Cu08 | O00G              | 1.958(5)   |
| Cu03 | C01P <sup>1</sup> | 2.091(7)   | Cu08 | C00Z              | 2.042(7)   |
| Cu04 | Cu0A              | 2.6729(13) | Cu08 | C01D <sup>3</sup> | 2.102(8)   |
| Cu04 | O00H              | 1.941(6)   | Cu08 | C01F <sup>3</sup> | 2.140(7)   |
| Cu04 | C00R              | 2.134(7)   | Cu09 | O00L              | 1.950(6)   |
| Cu04 | C013              | 2.053(6)   | Cu09 | N00Q <sup>2</sup> | 2.077(8)   |
| Cu04 | C019              | 2.060(7)   | Cu09 | C01D              | 1.933(8)   |
| Cu05 | Cu06 <sup>2</sup> | 2.6979(12) | Cu0A | O00K              | 1.945(6)   |
| Cu05 | Cu07              | 2.5224(11) | Cu0A | N012              | 2.017(7)   |
| Cu05 | Cu08 <sup>3</sup> | 2.9828(12) | Cu0A | C019              | 1.939(8)   |

<sup>1</sup>1-X,1-Y,1-Z; <sup>2</sup>+X,1+Y,+Z; <sup>3</sup>-X,2-Y,2-Z; <sup>4</sup>+X,-1+Y,+Z

**Table S15.** Bond lengths (Å) of **2b**.

| Atom | Atom              | Length/Å   | Atom | Atom              | Length/Å   |
|------|-------------------|------------|------|-------------------|------------|
| Cu01 | Cu02              | 2.6972(11) | Cu03 | Cu06 <sup>1</sup> | 2.7405(12) |
| Cu01 | Cu02 <sup>1</sup> | 2.6551(11) | Cu03 | N00D <sup>2</sup> | 2.076(6)   |
| Cu01 | Cu03              | 2.5497(11) | Cu03 | C00J              | 1.970(7)   |
| Cu01 | Cu04              | 2.4320(11) | Cu03 | C00N              | 2.017(8)   |
| Cu01 | Cu05              | 2.6863(12) | Cu04 | O008              | 1.995(5)   |

|      |                   |            |      |                   |            |
|------|-------------------|------------|------|-------------------|------------|
| Cu01 | Cu06              | 2.8629(12) | Cu04 | O00A              | 2.305(6)   |
| Cu01 | C00F              | 2.098(7)   | Cu04 | C00I              | 2.010(7)   |
| Cu01 | C00I              | 2.065(7)   | Cu04 | C00K              | 2.051(7)   |
| Cu01 | C00N              | 2.140(7)   | Cu04 | C00N              | 2.086(7)   |
| Cu01 | C015              | 2.500(7)   | Cu05 | Cu06              | 2.7280(13) |
| Cu02 | Cu02 <sup>1</sup> | 2.7648(16) | Cu05 | O007              | 2.028(6)   |
| Cu02 | Cu03 <sup>1</sup> | 2.6153(12) | Cu05 | C00I              | 2.070(7)   |
| Cu02 | Cu03              | 2.5791(11) | Cu05 | C00J <sup>1</sup> | 2.209(6)   |
| Cu02 | Cu06              | 2.5953(11) | Cu05 | C00S <sup>1</sup> | 2.280(7)   |
| Cu02 | C00F              | 2.053(7)   | Cu05 | C00X              | 2.109(7)   |
| Cu02 | C00J              | 2.080(7)   | Cu06 | O00B              | 1.881(6)   |
| Cu02 | C00N <sup>1</sup> | 2.082(7)   | Cu06 | C00F              | 1.888(8)   |

<sup>1</sup>1-X,1-Y,1-Z; <sup>2</sup>-1+X,-1+Y,+Z

**Table S16.** Bond lengths (Å) of **2c**.

| Atom | Atom             | Length/Å  | Atom | Atom | Length/Å  |
|------|------------------|-----------|------|------|-----------|
| Cu18 | Cu20             | 2.711(3)  | Cu39 | C70  | 2.12(2)   |
| Cu18 | Cu3              | 2.776(3)  | Cu36 | Cu1  | 2.537(3)  |
| Cu18 | Cu17             | 2.516(3)  | Cu36 | Cu37 | 2.588(3)  |
| Cu18 | Cu40             | 2.537(4)  | Cu36 | O77  | 1.970(14) |
| Cu18 | Cu1              | 2.679(2)  | Cu36 | C35  | 2.12(2)   |
| Cu18 | Cu56             | 2.679(3)  | Cu36 | C111 | 1.97(3)   |
| Cu18 | C22              | 2.03(2)   | Cu36 | C38  | 2.102(19) |
| Cu18 | C55              | 2.157(18) | Cu17 | C22  | 2.12(2)   |
| Cu18 | C19              | 1.944(19) | Cu17 | C64  | 2.07(2)   |
| Cu20 | Cu87             | 2.807(3)  | Cu17 | C55  | 2.00(2)   |
| Cu20 | Cu1              | 2.677(3)  | Cu17 | O16  | 1.912(18) |
| Cu20 | Cu21             | 2.763(4)  | Cu40 | Cu56 | 2.776(4)  |
| Cu20 | O30              | 2.018(14) | Cu40 | Cu37 | 2.692(3)  |
| Cu20 | C35              | 2.07(2)   | Cu40 | Cu42 | 2.784(4)  |
| Cu20 | C19              | 2.04(2)   | Cu40 | O69  | 2.168(15) |
| Cu86 | Cu87             | 2.819(4)  | Cu40 | C41  | 1.95(2)   |
| Cu86 | N85 <sup>1</sup> | 1.973(15) | Cu40 | C55  | 2.060(19) |
| Cu86 | O99              | 2.110(17) | Cu40 | C19  | 2.51(2)   |
| Cu86 | C88              | 2.03(2)   | Cu1  | Cu56 | 2.700(3)  |
| Cu86 | C89              | 2.091(17) | Cu1  | Cu37 | 2.770(4)  |
| Cu3  | Cu87             | 2.718(3)  | Cu1  | C2   | 1.966(19) |
| Cu3  | Cu17             | 2.571(4)  | Cu1  | C35  | 2.223(19) |
| Cu3  | Cu21             | 2.715(3)  | Cu1  | C38  | 2.08(2)   |
| Cu3  | C22              | 2.09(2)   | Cu56 | O57  | 2.024(15) |
| Cu3  | O4               | 2.056(16) | Cu56 | C2   | 2.02(2)   |

|      |      |           |      |                  |           |
|------|------|-----------|------|------------------|-----------|
| Cu3  | C2   | 2.15(2)   | Cu56 | C55              | 2.092(17) |
| Cu3  | C116 | 2.13(2)   | Cu37 | O75              | 2.040(14) |
| Cu3  | C88  | 2.54(2)   | Cu37 | C41              | 2.53(2)   |
| Cu87 | Cu1  | 2.502(3)  | Cu37 | C19              | 2.16(2)   |
| Cu87 | Cu21 | 2.768(4)  | Cu37 | C106             | 2.15(2)   |
| Cu87 | O97  | 2.128(14) | Cu37 | C38              | 2.04(2)   |
| Cu87 | C2   | 2.527(18) | Cu21 | C22              | 2.04(2)   |
| Cu87 | C35  | 1.99(2)   | Cu21 | O28              | 1.973(15) |
| Cu87 | C88  | 1.94(2)   | Cu21 | C88              | 2.12(2)   |
| Cu39 | Cu40 | 2.809(4)  | Cu21 | C23              | 2.15(2)   |
| Cu39 | Cu56 | 2.742(4)  | Cu42 | O43              | 2.022(18) |
| Cu39 | Cu37 | 2.697(4)  | Cu42 | C50              | 2.11(2)   |
| Cu39 | C41  | 2.20(2)   | Cu42 | C41              | 1.96(2)   |
| Cu39 | O59  | 2.016(15) | Cu42 | N13 <sup>2</sup> | 2.16(3)   |
| Cu39 | C38  | 2.019(19) |      |                  |           |

<sup>1</sup>1-X,1-Y,1/2+Z; <sup>2</sup>1-X,-Y,-1/2+Z

**Table S17.** Bond lengths (Å) of **3**.

| Atom | Atom              | Length/Å   | Atom | Atom              | Length/Å  |
|------|-------------------|------------|------|-------------------|-----------|
| Cu15 | Cu15 <sup>1</sup> | 2.8137(10) | Cu2  | Cu14 <sup>1</sup> | 2.7686(7) |
| Cu15 | Cu2               | 2.6329(7)  | Cu2  | N3 <sup>2</sup>   | 2.063(4)  |
| Cu15 | Cu2 <sup>1</sup>  | 2.5665(7)  | Cu2  | C56               | 1.972(4)  |
| Cu15 | Cu1               | 2.6591(7)  | Cu2  | C27               | 2.015(4)  |
| Cu15 | Cu1 <sup>1</sup>  | 2.6880(7)  | Cu1  | Cu29              | 2.4448(7) |
| Cu15 | Cu14 <sup>1</sup> | 2.6178(7)  | Cu1  | Cu14              | 2.7750(7) |
| Cu15 | C56 <sup>1</sup>  | 2.087(4)   | Cu1  | C27               | 2.150(5)  |
| Cu15 | C27               | 2.084(4)   | Cu1  | C46               | 2.075(5)  |
| Cu15 | C16 <sup>1</sup>  | 2.069(4)   | Cu1  | C16               | 2.097(4)  |
| Cu13 | Cu1               | 2.6988(7)  | Cu29 | O30               | 2.368(3)  |
| Cu13 | Cu14              | 2.7262(7)  | Cu29 | O34               | 1.993(3)  |
| Cu13 | O12               | 2.010(3)   | Cu29 | C27               | 2.103(4)  |
| Cu13 | C56 <sup>1</sup>  | 2.238(4)   | Cu29 | C46               | 2.022(5)  |
| Cu13 | C47               | 2.110(4)   | Cu29 | C2                | 2.043(4)  |
| Cu13 | C46               | 2.052(4)   | Cu14 | O22               | 1.883(3)  |
| Cu13 | C57 <sup>1</sup>  | 2.298(4)   | Cu14 | C16               | 1.912(4)  |
| Cu2  | Cu1               | 2.5671(7)  |      |                   |           |

<sup>1</sup>1-X,-Y,2-Z; <sup>2</sup>-1+X,1+Y,-1+Z

**Table S18.** Bond lengths (Å) of **4**.



| Atom | Atom              | Length/Å  | Atom | Atom              | Length/Å   |
|------|-------------------|-----------|------|-------------------|------------|
| Cu01 | Cu03              | 2.6443(7) | Cu03 | C00I              | 1.962(4)   |
| Cu01 | Cu04              | 2.6376(7) | Cu03 | Cu1               | 2.698(2)   |
| Cu01 | Cu04 <sup>1</sup> | 2.7651(8) | Cu04 | Cu04 <sup>1</sup> | 2.5772(11) |
| Cu01 | Cu05              | 2.7105(8) | Cu04 | Cu06              | 2.4699(8)  |
| Cu01 | O00A              | 1.963(3)  | Cu04 | C00F              | 2.048(4)   |
| Cu01 | C00G              | 2.057(4)  | Cu04 | C00G              | 2.284(4)   |
| Cu01 | C00K <sup>1</sup> | 2.072(4)  | Cu04 | C00K              | 1.944(4)   |
| Cu02 | Cu03 <sup>1</sup> | 2.7474(8) | Cu05 | O009              | 1.983(3)   |
| Cu02 | Cu04              | 2.7327(8) | Cu05 | C00F <sup>1</sup> | 2.065(4)   |
| Cu02 | Cu05 <sup>1</sup> | 2.5921(7) | Cu05 | C00I              | 2.079(4)   |
| Cu02 | Cu06              | 2.6421(8) | Cu05 | C00P <sup>1</sup> | 2.23(3)    |
| Cu02 | O008              | 2.091(3)  | Cu05 | Cu1               | 2.638(2)   |
| Cu02 | C00F              | 2.173(4)  | Cu05 | C4 <sup>1</sup>   | 2.093(8)   |
| Cu02 | C00I <sup>1</sup> | 2.274(4)  | Cu06 | O00B              | 1.955(3)   |
| Cu02 | C00K <sup>1</sup> | 2.139(4)  | Cu06 | C00F              | 2.074(4)   |
| Cu02 | C00S <sup>1</sup> | 2.202(4)  | Cu06 | C00G              | 2.050(4)   |
| Cu03 | Cu04              | 2.5715(7) | Cu06 | C00O              | 2.034(4)   |
| Cu03 | Cu05              | 2.7871(7) | C00I | Cu1               | 1.956(4)   |
| Cu03 | N00C <sup>2</sup> | 2.079(3)  | C00J | Cu1               | 2.171(4)   |
| Cu03 | C00G              | 1.978(4)  | Cu1  | O4                | 1.865(10)  |

<sup>1</sup>1/2-X,1/2-Y,1-Z; <sup>2</sup>+X,1-Y,1/2+Z
